# Supplementary material for: Data Preparation for West Nile Virus Agent-Based Modelling: Protocol for Processing Bird Population Estimates and Incorporating ArcMap in AnyLogic
Source: PubMed Central journal article supplement (PMC5537560; doi:10.2196/resprot.6213), 2017-07-17
Supplement: resprot_v6i7e138_app1.pdf [file resprot_v6i7e138_app1.pdf]

## APPENDIX

### Sample codes

#### Shapefile database connection string

The correct connection string for connecting to the database of a shapefile depends on the OS and the dBase associated drivers installed on it. In the example here, the OS is a 64-bit Microsoft Windows with a 64-bit Access Database Engine installed on it. If Anylogic is running on a 32-bit Java virtual machine, the required database driver must exist in the 32-bit version of ODBC data sources, and vice-versa for the 64-bit versions. This driver could be either MS Access dBase drive or FoxPro driver. The following Java example code is using the MS Access driver.

```
try {
    Class.forName("sun.jdbc.odbc.JdbcOdbcDriver");
    String connString = "jdbc:odbc:Driver={Microsoft Access dBASE Driver (*.dbf, *.ndx, *.mdx)};
DefaultDir=D:\\";
    // D:\ is the database location
    // Microsoft Access dBASE Driver (*.dbf, *.ndx, *.mdx) exists in Data Sources (ODBC)
    java.sql.Connection conn = java.sql.DriverManager.getConnection(connString);
    String sql="SELECT * from Grid"; // Grid.dbf is the file name
    java.sql.Statement stmt=conn.createStatement();
    java.sql.ResultSet resultSet=stmt.executeQuery(sql);
    while (resultSet!= null & resultSet.next())
        traceIn(resultSet.getString(1));

    traceIn("Done!");
}
catch (ClassNotFoundException e)
{
    e.printStackTrace();
}
catch (SQLException e) {
    e.printStackTrace();
}
```

Another connection string sample for C#.NET is as follows.

```
System.Data.OleDb.OleDbConnection connTest = new System.Data.OleDb.OleDbConnection();
connTest.ConnectionString = @"Provider=Microsoft.Jet.OLEDB.4.0;Data Source=D:\;Extended Properties=dBASE
IV;User ID=Admin;Password=";";
connTest.Open();
OleDbCommand com = new OleDbCommand("SELECT * FROM Grid",connTest);
```

#### Conversion of shapfile polygon features to Anylogic GIS regions

Polygon features in a shapefile are known as *PoliticalArea(s)* in Anylogic. The code below demonstrates how to extract the coordinates of all political areas in a shapefile, and store them in binary file using the libraries available in Anylogic 7.0.3. First a Java class called *GISPolygon* needs to be defined with the minimal functions. The coordinates of shapefile polygons are then stored in an instance of *GISPolygon*, and is saved as a binary file on the hard disk.

```
java.util.LinkedHashMap <Integer, GISPolygon> ShapefilePolygons = new java.util.LinkedHashMap<Integer,
GISPolygon>();
// Let's assume there's a GIS map component called map, and //
// the first shapefile on the map is the shapefile of our interest //
Object[] politicalAreasObjects = map.getLayers()[0].getPoliticalAreas().toArray();
PoliticalArea polArea;
GISPolygon gisPolygon;
int featureID=-1; // FID in shapefiles
for (int i=0;i<politicalAreasObjects.length;i++)
{
    polArea = (PoliticalArea) politicalAreasObjects[i];
    featureID = (int) Float.parseFloat(polArea.name); // The name coloumn index of the shapefile on the map
is set to refer to the FID
    OMGeometryList gmList = polArea.getGeometry();
    OMGraphicList grList = (OMGraphicList) gmList;
    Object parent = grList.getOMGraphicAt(0);
    Object child = ((OMGraphicList) parent).getOMGraphicAt(0);
    // There may be a number of nested layers of features in the shapefile//
    while (child.getClass().equals(OMGraphicList.class)) {
        child = ((OMGraphicList) child).getOMGraphicAt(0);
    }
}
```

```

        parent = ((OMGraphicList) parent).getOMGraphicAt(0);
    }
    int polyCount = ((OMGraphicList) parent).size(); // The number of political areas under the same FID
    gisPolygon = new GISPolygon(featureID);
    for(int j=0;j<polyCount;j++)
    {
        OMPoly poly = (OMPoly) ((OMGraphicList) parent).getOMGraphicAt(j);
        double[] polyCoords = poly.getLatLonArray();
        ProjMath.arrayRadToDeg(polyCoords);
        gisPolygon.AddLatLonArray(polyCoords);
    }
    ShapefilePolygons.put(featureID, gisPolygon);
}
gisPolygon.SaveShapefilePolgons(ShapefilePolygons, "D:\\MyShapefile.dat"); // Store on hard disk as a binary
file

```

The source code for the *GISPolygon* class is as follows.

```

public class GISPolygon implements Serializable {
    public ArrayList<double[]> latLonArrayList;
    public int npolygons=0;
    public int featureID;
    public GISPolygon() {
        this.featureID = -1; this.npolygons=0;
    }
    public GISPolygon(int featureID) {
        this.npolygons = 0; this.featureID = featureID;
    }
    public void AddLatLonArray(double[] latLonArray) {
        if (this.latLonArrayList == null)
            this.latLonArrayList = new ArrayList<double[]>();

        this.latLonArrayList.add(latLonArray);
        this.npolygons ++;
    }
    public void SaveShapefilePolgons(Object shapefilePolygons, String filePath) {
        try {
            FileOutputStream fout = new FileOutputStream(filePath);
            ObjectOutputStream oos = new ObjectOutputStream(fout);
            oos.writeObject(shapefilePolygons);
            oos.flush(); oos.close();
            System.out.println("File saved!");
        }
        catch(Exception ex) {
            traceln(ex.toString());
        }
    }
    private static final long serialVersionUID = 1L;
}

```

Some functions and libraries used above, such as casting from *OMGeometryList* to *OMGraphicList*, may not be available in all Anylogic versions. However, the coordinate extraction procedure is still similar, and could be adopted by developers.

Finally, the code below shows how to restore saved coordinates, and display them as Anylogic *GISRegion(s)* on a map. It is notable that the *GISRegion* component is not available in Anylogic 7.0.3, as such the code below was tested in Anylogic 7.2.0 PLE.

```

LinkedHashMap <Integer ,GISPolygon> loadedPolygon = new java.util.LinkedHashMap<Integer, GISPolygon>();
LinkedHashMap <Integer ,GISMultiRegion> MultiGISRegionsList = new LinkedHashMap<Integer, GISMultiRegion>();
try {
    ObjectInputStream in = new ObjectInputStream(new FileInputStream("D:\\MyShapefile.dat"));
    loadedPolygon = (LinkedHashMap<Integer, GISPolygon>) in.readObject();
    in.close();
}
catch(Exception ex) {
    traceln(ex.toString());
}
GISRegion gisRegion;
GISMultiRegion gisMulti;
for (Integer entryKey : loadedPolygon.keySet()){
    GISPolygon poly = loadedPolygon.get(entryKey);

```

```
gisMulti = new GISMultiRegion(entryKey.toString());
for (int i=0; i<poly.latLonArrayList.size();i++) {
    gisRegion = new GISRegion(map, poly.latLonArrayList.get(i));
    gisMulti.add(gisRegion);
    map.add(gisRegion);
}
MultiGISRegionsList.put(entryKey, gisMulti);
}
```

### ***Birds Species Data***

The collected data on bird species can be found in Table I below.

Table I BIRDS SPECIES

| Family and Species               | Common Name                | Home Range <sup>a</sup> | Flight Speed <sup>b</sup> | Roosting <sup>c</sup> | Breeding Months | Sources    |
|----------------------------------|----------------------------|-------------------------|---------------------------|-----------------------|-----------------|------------|
| <b>Accipitridae</b>              |                            |                         |                           |                       |                 |            |
| <i>Accipiter cooperii</i>        | Cooper's Hawk              | 905                     | 9                         | Solitary              | 4 - 7           | [1–3]      |
| <i>Accipiter striatus</i>        | Sharp-shinned Hawk         | 918                     | 7                         | Solitary              | 4 - 8           | [1,4]      |
| <i>Buteo jamaicensis</i>         | Red-tailed Hawk            | 1163                    | 9                         | Solitary              | 2 - 9           | [5–8]      |
| <i>Buteo platypterus</i>         | Broad-winged Hawk          | 583                     | 11                        | Solitary              | 5 - 8           | [9,10]     |
| <i>Buteo regalis</i>             | Ferruginous Hawk           | 1652                    | 16                        | Solitary              | 4 - 8           | [11–13]    |
| <i>Buteo swainsoni</i>           | Swainson's Hawk            | 2249                    | 7                         | Communal              | 4 - 8           | [11,14,15] |
| <i>Circus cyaneus</i>            | Northern Harrier           | 910                     | 9                         | Solitary              | 4 - 9           | [6,16,17]  |
| <i>Haliaeetus leucocephalus</i>  | Bald Eagle                 | 2622                    | 13                        | Solitary              | 4 - 9           | [18–20]    |
| <b>Alaudidae</b>                 |                            |                         |                           |                       |                 |            |
| <i>Eremophila alpestris</i>      | Horned Lark                | 127                     | 11                        | Flocking              | 3 - 8           | [21–23]    |
| <b>Alcedinidae</b>               |                            |                         |                           |                       |                 |            |
| <i>Megaceryle alcyon</i>         | Belted Kingfisher          | 1609                    | 8                         | Solitary              | 4 - 8           | [24–26]    |
| <b>Apodidae</b>                  |                            |                         |                           |                       |                 |            |
| <i>Chaetura pelagica</i>         | Chimney Swift              | 4000                    | 13                        | Communal              | 6 - 8           | [27,28]    |
| <b>Bombycillidae</b>             |                            |                         |                           |                       |                 |            |
| <i>Bombycilla cedrorum</i>       | Cedar Waxwing              | 36                      | 9                         | Communal              | 6 - 10          | [29–31]    |
| <b>Calcariidae</b>               |                            |                         |                           |                       |                 |            |
| <i>Calcarius ornatus</i>         | Chestnut-collared Longspur | 112                     | 9                         | Flocking              | 5 - 8           | [32,33]    |
| <b>Caprimulgidae</b>             |                            |                         |                           |                       |                 |            |
| <i>Chordeiles minor</i>          | Common Nighthawk           | 523                     | 10                        | Flocking              | 6 - 9           | [11,34]    |
| <b>Cardinalidae</b>              |                            |                         |                           |                       |                 |            |
| <i>Passerina cyanea</i>          | Indigo Bunting             | 160                     | 9                         | Solitary              | 6 - 9           | [11,35]    |
| <i>Pheucticus ludovicianus</i>   | Rose-breasted Grosbeak     | 140                     | 8                         | Solitary              | 6 - 8           | [36–38]    |
| <i>Piranga olivacea</i>          | Scarlet Tanager            | 199                     | 8                         | Solitary              | 6 - 8           | [37,39]    |
| <i>Spiza americana</i>           | Dickcissel                 | 390                     | 11                        | Flocking              | 5 - 8           | [11,40,41] |
| <b>Cathartidae</b>               |                            |                         |                           |                       |                 |            |
| <i>Cathartes aura</i>            | Turkey Vulture             | 12657                   | 13                        | Communal              | 5 - 9           | [42–44]    |
| <b>Certhiidae</b>                |                            |                         |                           |                       |                 |            |
| <i>Certhia americana</i>         | Brown Creeper              | 500                     | 7                         | Solitary              | 5 - 8           | [37,45]    |
| <b>Columbidae</b>                |                            |                         |                           |                       |                 |            |
| <i>Columba livia</i>             | Rock Pigeon                | 5300                    | 16                        | Communal              | 4 - 11          | [46,47]    |
| <i>Zenaida macroura</i>          | Mourning Dove              | 4000                    | 17                        | Communal              | 3 - 10          | [27,48,49] |
| <i>Corvus brachyrhynchos</i>     | American Crow              | 1555                    | 11                        | Flocking              | 3 - 6           | [50–52]    |
| <b>Corvidae</b>                  |                            |                         |                           |                       |                 |            |
| <i>Corvus corax</i>              | Common Raven               | 3590                    | 11                        | Communal              | 3 - 7           | [50,53]    |
| <i>Cyanocitta cristata</i>       | Blue Jay <sup>d</sup>      | 103                     | 9                         | Solitary              | 4 - 6           | [22,54–56] |
| <i>Perisoreus canadensis</i>     | Gray Jay <sup>d</sup>      | 455                     | 9                         | Solitary              | 3 - 6           | [55,57]    |
| <i>Pica hudsonia</i>             | Black-billed Magpie        | 126                     | 8                         | Flocking              | 4 - 6           | [58,59]    |
| <b>Cuculidae</b>                 |                            |                         |                           |                       |                 |            |
| <i>Coccyzus erythrophthalmus</i> | Black-billed Cuckoo        | 305                     | 10                        | Solitary              | 6 - 10          | [11,60,61] |

**Emberizidae**

|                                  |                        |     |    |          |       |               |
|----------------------------------|------------------------|-----|----|----------|-------|---------------|
| <i>Ammodramus bairdii</i>        | Baird's Sparrow        | 200 | 7  | Flocking | 6 - 9 | [62,63]       |
| <i>Ammodramus leconteii</i>      | Le Conte's Sparrow     | 200 | 7  | Solitary | 6 - 9 | [62,64]       |
| <i>Ammodramus savannarum</i>     | Grasshopper Sparrow    | 75  | 7  | Solitary | 6 - 8 | [62,65,66]    |
| <i>Chondestes grammacus</i>      | Lark Sparrow           | 139 | 12 | Flocking | 5 - 8 | [11,31,67]    |
| <i>Junco hyemalis</i>            | Dark-eyed Junco        | 82  | 8  | Flocking | 5 - 9 | [26,37,68]    |
| <i>Melospiza georgiana</i>       | Swamp Sparrow          | 113 | 13 | Flocking | 5 - 8 | [11,69,70]    |
| <i>Melospiza lincolni</i>        | Lincoln's Sparrow      | 100 | 13 | Solitary | 6 - 8 | [11,71]       |
| <i>Melospiza melodia</i>         | Song Sparrow           | 113 | 13 | Solitary | 3 - 9 | [11,72,73]    |
| <i>Passerculus sandwichensis</i> | Savannah Sparrow       | 170 | 16 | Flocking | 6 - 9 | [22,74,75]    |
| <i>Pipilo erythrophthalmus</i>   | Eastern Towhee         | 300 | 8  | Solitary | 5 - 8 | [37,76]       |
| <i>Pipilo maculatus</i>          | Spotted Towhee         | 157 | 8  | Solitary | 4 - 8 | [37,77–79]    |
| <i>Poocetes gramineus</i>        | Vesper Sparrow         | 142 | 7  | Flocking | 5 - 9 | [11,80,81]    |
| <i>Spizella pallida</i>          | Clay-colored Sparrow   | 99  | 9  | Flocking | 6 - 8 | [11,38,82]    |
| <i>Spizella passerina</i>        | Chipping Sparrow       | 99  | 9  | Flocking | 4 - 9 | [11,38,73,83] |
| <i>Zonotrichia albicollis</i>    | White-throated Sparrow | 93  | 8  | Flocking | 6 - 8 | [11,84]       |

**Falconidae**

|                          |                  |      |    |          |       |           |
|--------------------------|------------------|------|----|----------|-------|-----------|
| <i>Falco columbarius</i> | Merlin           | 2523 | 14 | Solitary | 3 - 9 | [85,86]   |
| <i>Falco sparverius</i>  | American Kestrel | 671  | 10 | Solitary | 4 - 8 | [6,87,88] |

**Fringillidae**

|                                   |                        |      |    |          |        |                  |
|-----------------------------------|------------------------|------|----|----------|--------|------------------|
| <i>Carpodacus mexicanus</i>       | House Finch            | 1500 | 6  | Communal | 4 - 8  | [89–91]          |
| <i>Carpodacus purpureus</i>       | Purple Finch           | 380  | 6  | Solitary | 4 - 9  | [90,92,93]       |
| <i>Coccothraustes vespertinus</i> | Evening Grosbeak       | 359  | 17 | Flocking | 5 - 8  | [94–96]          |
| <i>Loxia curvirostra</i>          | Red Crossbill          | 254  | 9  | Communal | 1 - 10 | [22,37,70,97,98] |
| <i>Loxia leucoptera</i>           | White-winged Crossbill | 1000 | 9  | Communal | 1 - 11 | [37,99]          |
| <i>Spinus pinus</i>               | Pine Siskin            | 113  | 15 | Communal | 4 - 8  | [70,100,101]     |
| <i>Spinus tristis</i>             | American Goldfinch     | 800  | 7  | Communal | 7 - 9  | [22,102,103]     |

**Hirundinidae**

|                                   |                               |      |    |          |       |                  |
|-----------------------------------|-------------------------------|------|----|----------|-------|------------------|
| <i>Hirundo rustica</i>            | Barn Swallow                  | 600  | 7  | Communal | 5 - 9 | [104–106]        |
| <i>Petrochelidon pyrrhonota</i>   | Cliff Swallow                 | 1500 | 8  | Communal | 5 - 8 | [107,108]        |
| <i>Progne subis</i>               | Purple Martin                 | 2871 | 12 | Communal | 5 - 8 | [22,49,109–111]  |
| <i>Riparia riparia</i>            | Bank Swallow                  | 800  | 14 | Communal | 4 - 8 | [16,106,112]     |
| <i>Stelgidopteryx serripennis</i> | Northern Rough-winged Swallow | 500  | 7  | Solitary | 5 - 7 | [105,113]        |
| <i>Tachycineta bicolor</i>        | Tree Swallow                  | 4000 | 7  | Communal | 5 - 7 | [49,106,114,115] |

**Icteridae**

|                               |                      |       |    |          |       |                  |
|-------------------------------|----------------------|-------|----|----------|-------|------------------|
| <i>Agelaius phoeniceus</i>    | Red-winged Blackbird | 1609  | 7  | Communal | 4 - 8 | [116–119]        |
| <i>Dolichonyx oryzivorus</i>  | Bobolink             | 90    | 7  | Flocking | 6 - 8 | [119–121]        |
| <i>Euphagus carolinus</i>     | Rusty Blackbird      | 345   | 8  | Communal | 5 - 8 | [122]            |
| <i>Euphagus cyanocephalus</i> | Brewer's Blackbird   | 1600  | 12 | Communal | 2 - 8 | [123–125]        |
| <i>Icterus galbula</i>        | Baltimore Oriole     | 100   | 11 | Solitary | 5 - 7 | [11,70,126]      |
| <i>Icterus spurius</i>        | Orchard Oriole       | 113   | 11 | Communal | 6 - 8 | [11,31,127]      |
| <i>Molothrus ater</i>         | Brown-headed Cowbird | 1186  | 13 | Communal | 4 - 8 | [128,129]        |
| <i>Quiscalus quiscula</i>     | Common Grackle       | 12921 | 14 | Communal | 4 - 7 | [27,116,130,131] |
| <i>Sturnella neglecta</i>     | Western Meadowlark   | 149   | 9  | Flocking | 4 - 9 | [70,132]         |

|                                      |                                |       |    |          |        |                     |
|--------------------------------------|--------------------------------|-------|----|----------|--------|---------------------|
| <i>Xanthocephalus xanthocephalus</i> | Yellow-headed Blackbird        | 1600  | 10 | Communal | 5 - 8  | [26,133,134]        |
| <b>Laniidae</b>                      |                                |       |    |          |        |                     |
| <i>Lanius ludovicianus</i>           | Loggerhead Shrike              | 207   | 13 | Solitary | 3 - 7  | [6,88,135,136]      |
| <b>Mimidae</b>                       |                                |       |    |          |        |                     |
| <i>Dumetella carolinensis</i>        | Gray Catbird                   | 37    | 7  | Solitary | 5 - 8  | [11,70,137]         |
| <i>Mimus polyglottos</i>             | Northern Mockingbird           | 102   | 8  | Solitary | 3 - 8  | [6,37,70,138,139]   |
| <i>Toxostoma rufum</i>               | Brown Thrasher                 | 113   | 10 | Solitary | 4 - 8  | [37,140,141]        |
| <b>Motacillidae</b>                  |                                |       |    |          |        |                     |
| <i>Anthus spragueii</i>              | Sprague's Pipit                | 143   | 6  | Solitary | 5 - 8  | [142,143]           |
| <b>Pandionidae</b>                   |                                |       |    |          |        |                     |
| <i>Pandion haliaetus</i>             | Osprey                         | 14000 | 13 | Solitary | 5 - 9  | [27,144]            |
| <b>Paridae</b>                       |                                |       |    |          |        |                     |
| <i>Poecile atricapillus</i>          | Black-capped Chickadee         | 216   | 5  | Communal | 4 - 7  | [6,145–147]         |
| <i>Poecile hudsonicus</i>            | Boreal Chickadee               | 216   | 5  | Flocking | 5 - 9  | [146,148,149]       |
| <b>Parulidae</b>                     |                                |       |    |          |        |                     |
| <i>Cardellina canadensis</i>         | Canada Warbler                 | 80    | 7  | Flocking | 6 - 8  | [37,150–152]        |
| <i>Cardellina pusilla</i>            | Wilson's Warbler               | 213   | 7  | Solitary | 6 - 8  | [37,152–154]        |
| <i>Geothlypis philadelphia</i>       | Mourning Warbler <sup>d</sup>  | 113   | 7  | Solitary | 6 - 9  | [6,37,70,155,156]   |
| <i>Geothlypis trichas</i>            | Common Yellowthroat            | 96    | 7  | Solitary | 6 - 8  | [37,70,157,158]     |
| <i>Mniotilta varia</i>               | Black-and-white Warbler        | 145   | 7  | Solitary | 5 - 8  | [37,152,159,160]    |
| <i>Oporornis agilis</i>              | Connecticut Warbler            | 39    | 7  | Solitary | 6 - 8  | [37,152,159,161]    |
| <i>Oreothlypis celata</i>            | Orange-crowned Warbler         | 80    | 7  | Solitary | 4 - 8  | [37,152,162,163]    |
| <i>Oreothlypis peregrina</i>         | Tennessee Warbler              | 124   | 7  | Flocking | 7 - 9  | [31,37,152,164,165] |
| <i>Oreothlypis ruficapilla</i>       | Nashville Warbler <sup>d</sup> | 113   | 7  | Solitary | 6 - 8  | [37,70,152,166]     |
| <i>Parkesia noveboracensis</i>       | Northern Waterthrush           | 206   | 8  | Solitary | 6 - 8  | [37,167]            |
| <i>Seiurus aurocapilla</i>           | Ovenbird                       | 98    | 8  | Solitary | 5 - 8  | [6,37,168]          |
| <i>Setophaga americana</i>           | Northern Parula                | 45    | 7  | Solitary | 4 - 8  | [37,70,169]         |
| <i>Setophaga castanea</i>            | Bay-breasted Warbler           | 106   | 7  | Solitary | 6 - 8  | [37,70,170]         |
| <i>Setophaga coronata</i>            | Yellow-rumped Warbler          | 169   | 7  | Flocking | 6 - 8  | [37,171,172]        |
| <i>Setophaga fusca</i>               | Blackburnian Warbler           | 59    | 7  | Flocking | 6 - 8  | [6,37,173]          |
| <i>Setophaga magnolia</i>            | Magnolia Warbler               | 113   | 7  | Solitary | 6 - 9  | [6,37,70,174]       |
| <i>Setophaga palmarum</i>            | Palm Warbler                   | 110   | 7  | Solitary | 5 - 8  | [37,175]            |
| <i>Setophaga pennsylvanica</i>       | Chestnut-sided Warbler         | 95    | 7  | Flocking | 6 - 9  | [31,37,176]         |
| <i>Setophaga petechia</i>            | Yellow Warbler                 | 490   | 11 | Flocking | 6 - 8  | [152,177]           |
| <i>Setophaga pinus</i>               | Pine Warbler                   | 99    | 7  | Flocking | 5 - 7  | [37,178,179]        |
| <i>Setophaga ruticilla</i>           | American Redstart              | 45    | 6  | Solitary | 6 - 8  | [6,37,70,180]       |
| <i>Setophaga striata</i>             | Blackpoll Warbler              | 117   | 6  | Flocking | 6 - 8  | [37,181,182]        |
| <i>Setophaga tigrina</i>             | Cape May Warbler               | 56    | 7  | Solitary | 6 - 8  | [37,183]            |
| <i>Setophaga virens</i>              | Black-throated Green Warbler   | 113   | 7  | Flocking | 5 - 8  | [6,37,70,184]       |
| <i>Vermivora chrysoptera</i>         | Golden-winged Warbler          | 138   | 7  | Solitary | 5 - 8  | [37,164,185]        |
| <b>Passeridae</b>                    |                                |       |    |          |        |                     |
| <i>Passer domesticus</i>             | House Sparrow                  | 1500  | 13 | Communal | 4 - 9  | [27,49,186,187]     |
| <b>Phasianidae</b>                   |                                |       |    |          |        |                     |
| <i>Bonasa umbellus</i>               | Ruffed Grouse                  | 164   | 8  | Solitary | 4 - 11 | [188,189]           |

|                                   |                                |      |    |          |        |                     |
|-----------------------------------|--------------------------------|------|----|----------|--------|---------------------|
| <i>Meleagris gallopavo</i>        | Wild Turkey                    | 3586 | 14 | Communal | 4 - 11 | [22,190]            |
| <i>Perdix perdix</i>              | Gray Partridge                 | 623  | 13 | Communal | 4 - 7  | [191–193]           |
| <i>Phasianus colchicus</i>        | Ring-necked Pheasant           | 339  | 12 | Flocking | 4 - 10 | [194–196]           |
| <i>Tympanuchus phasianellus</i>   | Sharp-tailed Grouse            | 608  | 13 | Communal | 5 - 8  | [11,197]            |
| <b>Picidae</b>                    |                                |      |    |          |        |                     |
| <i>Colaptes auratus</i>           | Northern Flicker               | 282  | 7  | Solitary | 5 - 7  | [198,199]           |
| <i>Dryocopus pileatus</i>         | Pileated Woodpecker            | 896  | 7  | Solitary | 5 - 7  | [56,70,199,200]     |
| <i>Melanerpes erythrocephalus</i> | Red-headed Woodpecker          | 164  | 5  | Solitary | 5 - 9  | [201,202]           |
| <i>Picoides arcticus</i>          | Black-backed Woodpecker        | 594  | 7  | Solitary | 6 - 8  | [199,201]           |
| <i>Picoides dorsalis</i>          | American Three-toed Woodpecker | 608  | 7  | Solitary | 6 - 8  | [199,201,203]       |
| <i>Picoides pubescens</i>         | Downy Woodpecker               | 126  | 6  | Solitary | 4 - 7  | [199,204]           |
| <i>Picoides villosus</i>          | Hairy Woodpecker               | 460  | 8  | Solitary | 4 - 8  | [199,205–208]       |
| <b>Regulidae</b>                  |                                |      |    |          |        |                     |
| <i>Regulus calendula</i>          | Ruby-crowned Kinglet           | 138  | 6  | Solitary | 5 - 8  | [37,209]            |
| <i>Regulus satrapa</i>            | Golden-crowned Kinglet         | 89   | 6  | Solitary | 6 - 9  | [37,70,210]         |
| <b>Sittidae</b>                   |                                |      |    |          |        |                     |
| <i>Sitta canadensis</i>           | Red-breasted Nuthatch          | 178  | 5  | Solitary | 5 - 8  | [70,211,212]        |
| <i>Sitta carolinensis</i>         | White-breasted Nuthatch        | 219  | 5  | Solitary | 5 - 7  | [70,146,213]        |
| <b>Strigidae</b>                  |                                |      |    |          |        |                     |
| <i>Asio flammeus</i>              | Short-eared Owl                | 511  | 12 | Flocking | 4 - 7  | [11,214,215]        |
| <i>Bubo virginianus</i>           | Great Horned Owl               | 981  | 17 | Solitary | 3 - 4  | [214,216–218]       |
| <i>Strix varia</i>                | Barred Owl                     | 689  | 6  | Solitary | 2 - 10 | [219,220]           |
| <b>Sturnidae</b>                  |                                |      |    |          |        |                     |
| <i>Sturnus vulgaris</i>           | European Starling              | 7500 | 11 | Communal | 4 - 7  | [27,49,116,221,222] |
| <b>Trochilidae</b>                |                                |      |    |          |        |                     |
| <i>Archilochus colubris</i>       | Ruby-throated Hummingbird      | 183  | 13 | Solitary | 5 - 10 | [223–226]           |
| <b>Troglodytidae</b>              |                                |      |    |          |        |                     |
| <i>Cistothorus palustris</i>      | Marsh Wren                     | 56   | 7  | Solitary | 4 - 9  | [227–229]           |
| <i>Cistothorus platensis</i>      | Sedge Wren                     | 139  | 7  | Solitary | 6 - 9  | [37,230–232]        |
| <i>Troglodytes aedon</i>          | House Wren                     | 75   | 7  | Solitary | 5 - 9  | [6,37,233,234]      |
| <i>Troglodytes hiemalis</i>       | Winter Wren                    | 138  | 7  | Solitary | 5 - 9  | [37,235]            |
| <b>Turdidae</b>                   |                                |      |    |          |        |                     |
| <i>Catharus fuscescens</i>        | Veery <sup>d</sup>             | 113  | 15 | Flocking | 6 - 7  | [70,236,237]        |
| <i>Catharus guttatus</i>          | Hermit Thrush                  | 103  | 15 | Communal | 5 - 9  | [70,237,238]        |
| <i>Catharus ustulatus</i>         | Swainson's Thrush              | 128  | 15 | Solitary | 6 - 9  | [237,239,240]       |
| <i>Sialia currucoides</i>         | Mountain Bluebird              | 147  | 8  | Flocking | 4 - 9  | [11,241,242]        |
| <i>Sialia sialis</i>              | Eastern Bluebird               | 247  | 8  | Communal | 3 - 9  | [6,11,243]          |
| <i>Turdus migratorius</i>         | American Robin                 | 400  | 9  | Communal | 4 - 8  | [27,37,244–247]     |
| <b>Tyrannidae</b>                 |                                |      |    |          |        |                     |
| <i>Contopus cooperi</i>           | Olive-sided Flycatcher         | 219  | 7  | Solitary | 6 - 9  | [248,249]           |
| <i>Contopus sordidulus</i>        | Western Wood-Pewee             | 82   | 7  | Solitary | 5 - 9  | [250–252]           |
| <i>Contopus virens</i>            | Eastern Wood-Pewee             | 118  | 7  | Solitary | 5 - 9  | [38,250,253]        |
| <i>Empidonax alnorum</i>          | Alder Flycatcher               | 98   | 13 | Solitary | 6 - 8  | [70,254,255]        |
| <i>Empidonax flaviventris</i>     | Yellow-bellied Flycatcher      | 113  | 13 | Flocking | 6 - 8  | [70,255,256]        |

|                             |                             |     |    |          |       |                    |
|-----------------------------|-----------------------------|-----|----|----------|-------|--------------------|
| <i>Empidonax minimus</i>    | Least Flycatcher            | 60  | 13 | Communal | 6 - 8 | [6,70,255,257,258] |
| <i>Empidonax traillii</i>   | Willow Flycatcher           | 81  | 13 | Solitary | 6 - 9 | [255,259,260]      |
| <i>Myiarchus crinitus</i>   | Great Crested Flycatcher    | 101 | 10 | Solitary | 5 - 8 | [70,248,255,261]   |
| <i>Sayornis phoebe</i>      | Eastern Phoebe <sup>e</sup> | 95  | 10 | Solitary | 4 - 8 | [70,262,263]       |
| <i>Sayornis saya</i>        | Say's Phoebe <sup>e</sup>   | 94  | 10 | Solitary | 5 - 8 | [264,265]          |
| <i>Tyrannus tyrannus</i>    | Eastern Kingbird            | 212 | 10 | Flocking | 6 - 8 | [11,38,263,266]    |
| <i>Tyrannus verticalis</i>  | Western Kingbird            | 219 | 8  | Solitary | 5 - 7 | [11,22,267,268]    |
| <b>Vireonidae</b>           |                             |     |    |          |       |                    |
| <i>Vireo flavifrons</i>     | Yellow-throated Vireo       | 100 | 8  | Solitary | 6 - 8 | [37,269]           |
| <i>Vireo gilvus</i>         | Warbling Vireo              | 100 | 8  | Solitary | 5 - 8 | [37,270–272]       |
| <i>Vireo olivaceus</i>      | Red-eyed Vireo              | 109 | 8  | Flocking | 5 - 8 | [37,270,273]       |
| <i>Vireo philadelphicus</i> | Philadelphia Vireo          | 113 | 8  | Solitary | 6 - 8 | [37,274]           |
| <i>Vireo solitarius</i>     | Blue-headed Vireo           | 100 | 8  | Solitary | 6 - 8 | [37,275]           |

<sup>a</sup> Home range values are the ceiling for the average radius of an estimated circular home range area in meters.

<sup>b</sup> Flight speed values are reported in meters per second. As it was not clear as to the type of speed that different papers reported, it is not recommended to compare the birds' speed by these values.

<sup>c</sup> Flocking under the Roosting column means that the species roost individually or in pairs during the breeding season, and then form flocks for migration in the fall.

<sup>d</sup> It is notable that for the Mourning Warbler, Veery, and Nashville Warbler, the sources of data were not clear as to the type of roosting that they did. The entries given represent a best guess, but further data would be needed for greater precision. Specifically, for the Veery, no mention of communal roosting was found in literature, but no mention of any other type was found. The Blue Jay and Gray Jay were difficult to properly categorize due to ambiguity in literature regarding their roosting behaviour.

<sup>e</sup> For the flight speeds of Eastern Phoebe and Say's Phoebe species, the average speed of the Tyrannidae birds in the dataset is used.

## REFERENCES FOR APPENDIX

- Goodwin MBB V. Flight-Speeds of Hawks and Crows. Auk [Internet] 1943 [cited 2015 Nov 5];60(4):487–492. Available from: <https://sora.unm.edu/node/18587>
- Curtis OE, Rosenfield RN, Bielefeldt J. Cooper's Hawk (*Accipiter cooperii*). Poole A, Gill F, editors. Birds North Am Online [Internet] 2006; Available from: [http://bna.birds.cornell.edu/BNA/account/Coopers\\_Hawk/RECOMMENDED\\_CITATION.html](http://bna.birds.cornell.edu/BNA/account/Coopers_Hawk/RECOMMENDED_CITATION.html)
- Polite C, Kiff L. COOPER'S HAWK *Accipiter cooperii*. In: Zeiner DC, Jr. WFL, Mayer KE, White M, editors. Calif Wildl Habitat Relationships Vol I-III. Sacramento, California: California Depart. of Fish and Game; 1990.
- Bildstein KL, Meyer K. Sharp-shinned Hawk (*Accipiter striatus*). Poole A, Gill F, editors. Birds North Am Online [Internet] 2000; Available from: <http://bna.birds.cornell.edu/bna/species/482>
- Johnson S. Red-Tailed Hawks (*Buteo jamaicensis*) [Internet]. 2011 [cited 2015 Nov 5]. Available from: <http://beautyofbirds.com/redtailedhawks.html>. Arhived at: <http://www.webcitation.org/6lCvnOQP>
- Schoener TW. Sizes of Feeding Territories among Birds Ecological Society of America. Ecol Soc Am Stable 1968;49(1):123–141.
- Polite C, Pratt J, Bailey S. RED-TAILED HAWK *Buteo jamaicensis*. In: Zeiner DC, Jr. WFL, Mayer KE, White M, editors. Calif Wildl Habitat Relationships Vol I-III. Sacramento, California: California Depart. of Fish and Game; 1990.
- Preston CR, Beane RD. Red-tailed Hawk (*Buteo jamaicensis*). Poole A, Gill F, editors. Birds North Am Online [Internet] 2009; Available from: [http://bna.birds.cornell.edu/BNA/account/Red-tailed\\_Hawk/RECOMMENDED\\_CITATION.html](http://bna.birds.cornell.edu/BNA/account/Red-tailed_Hawk/RECOMMENDED_CITATION.html)
- Goodrich LJ, Crocoll ST, Senner SE. Broad-winged Hawk (*Buteo platypterus*). Poole A, Gill F, editors. Birds North Am Online [Internet] 2014; Available from: [http://bna.birds.cornell.edu/BNA/account/Broad-winged\\_Hawk/RECOMMENDED\\_CITATION.html](http://bna.birds.cornell.edu/BNA/account/Broad-winged_Hawk/RECOMMENDED_CITATION.html)
- Bloom PH, Mccrary MD, Gibson MJ. Red-Shouldered Hawk Home-Range and Habitat Use in Southern California. J Wildl Manage [Internet] 1993;57(2):258–265. Available from: <http://www.jstor.org/stable/3809422>
- Bumstead P. Canadian Feathers : a Loon-atics Guide to Anting, Mimicry and Dump-nesting [Internet]. Simply Wild Publications; 2001 [cited 2015 Nov 5]. Available from: <https://books.google.com/books?id=vmkmuyvhxqAC&pgis=1> ISBN:0968927807
- Dwight GS, Murphy JR. Breeding ecology of raptors in the eastern Great Basin of Utah [Internet]. Brigham Young Univ Sci Bull - Biol Ser. 1973 [cited 2015 Nov 5]. p. 1–76. Available from: <https://ojs.lib.byu.edu/spc/index.php/BYUSciBullBioS/article/view/30664>



13. Bechard MJ, Schmutz JK. Ferruginous Hawk (*Buteo regalis*). Poole A, Gill F, editors. *Birds North Am Online* [Internet] 1995; Available from: <http://bna.birds.cornell.edu/bna/species/172>
14. Bechard MJ, Houston CS, Sarasola JH, England AS. Swainson's Hawk (*Buteo swainsoni*). Poole A, Gill F, editors. *Birds North Am Online* [Internet] 2010; Available from: [http://bna.birds.cornell.edu/BNA/account/Swainsons\\_Hawk/RECOMMENDED\\_CITATION.html](http://bna.birds.cornell.edu/BNA/account/Swainsons_Hawk/RECOMMENDED_CITATION.html)
15. Polite C, Kiff L. SWAINSON'S HAWK *Buteo swainsoni*. In: Zeiner DC, Jr. WFL, Mayer KE, White M, editors. *Calif Wildl Habitat Relationships Vol I-III*. Sacramento, California: California Depart. of Fish and Game; 1990.
16. Alerstam T, Rosén M, Bäckman J, Ericson PGP, Hellgren O. Flight Speeds among Bird Species: Allometric and Phylogenetic Effects. Sheldon B, editor. *PLoS Biol* [Internet] 2007 Jul 17;5(8):e197. Available from: <http://dx.plos.org/10.1371/journal.pbio.0050197> DOI:10.1371/journal.pbio.0050197
17. Smith KG, Wittenberg SR, Macwhirter RB, Bildstein KL. Northern Harrier (*Circus cyaneus*). Poole A, Gill F, editors. *Birds North Am Online* [Internet] 2011; Available from: [http://bna.birds.cornell.edu/BNA/account/Northern\\_Harrier/RECOMMENDED\\_CITATION.html](http://bna.birds.cornell.edu/BNA/account/Northern_Harrier/RECOMMENDED_CITATION.html)
18. Travsky A, Equvais DGP. Species Assessment for Bald Eagle (*Haliaeetus leucocephalus*) in Wyoming [Internet]. 2004. Available from: <http://www.blm.gov/pgdata/etc/medialib/blm/wy/wildlife/animal-assessmnts.Par.41209.File.dat/BaldEagle.pdf>. Archived at: <http://www.webcitation.org/6lCxxhG1lp>
19. Rutledge H. Bald Eagle Description Page 2 [Internet]. *Am Bald Eagle Inf.* [cited 2015 Nov 5]. Available from: <http://www.baldeagleinfo.com/eagle/eagle8.html> Archived at: <http://www.webcitation.org/6lD5OKOFU>
20. Buehler DA. Bald Eagle (*Haliaeetus leucocephalus*). Poole A, Gill F, editors. *Birds North Am Online* [Internet] 2000; Available from: [http://bna.birds.cornell.edu/BNA/account/Bald\\_Eagle/RECOMMENDED\\_CITATION.html](http://bna.birds.cornell.edu/BNA/account/Bald_Eagle/RECOMMENDED_CITATION.html)
21. Cannings RJ, Threlfall W. Horned Lark Breeding Biology at Cape St. Mary's, Newfoundland. *Wilson Bull* [Internet] 1981 [cited 2015 Nov 19];93(4):12. Available from: <http://www.jstor.org/stable/4161544>
22. Cooke MT. Flight speed of birds [Internet]. Washington, D.C. : U.S. Dept. of Agriculture,; 1937 [cited 2015 Nov 4]. Available from: <http://www.biodiversitylibrary.org/bibliography/64128> DOI:10.5962/bhl.title.64128
23. Beason RC. Horned Lark (*Eremophila alpestris*). Poole A, Gill F, editors. *Birds North Am Online* [Internet] 1995; Available from: [http://bna.birds.cornell.edu/BNA/account/Horned\\_Lark/RECOMMENDED\\_CITATION.html](http://bna.birds.cornell.edu/BNA/account/Horned_Lark/RECOMMENDED_CITATION.html)
24. Kelly JF, Bridge ES, Hamas MJ. Belted Kingfisher (*Ceryle alcyon*). Poole A, Gill F, editors. *Birds North Am Online* [Internet] 2009; Available from: [http://bna.birds.cornell.edu/BNA/account/Belted\\_Kingfisher/RECOMMENDED\\_CITATION.html](http://bna.birds.cornell.edu/BNA/account/Belted_Kingfisher/RECOMMENDED_CITATION.html)
25. Green M, Mewaldt L, Duke R, Winkler D. BELTED KINGFISHER *Megaceryle alcyon*. In: Zeiner DC, Jr. WFL, Mayer KE, White M, editors. *Calif Wildl Habitat Relationships Vol I-III*. Sacramento, California: California Depart. of Fish and Game; 1990.
26. Wood HB. Flight Speed of Some Birds. *Auk* [Internet] 1933 [cited 2015 Nov 4];50(4):452–453. Available from: <https://sora.unm.edu/node/16252> DOI:10.2307/4077639
27. Schnell GD, Hellack JJ. Flight Speeds of Brown Pelicans, Chimney Swifts, and Other Birds. *Bird-Banding* 1978;49(2):108–112.
28. Steeves TK, Kearney-McGee SB, Rubega MA, Cink CL, Collins CT. Chimney Swift (*Chaetura pelagica*). Poole A, Gill F, editors. *Birds North Am Online* [Internet] 2014; Available from: <http://bna.birds.cornell.edu/bna/species/646>
29. Witmer MC, Mountjoy DJ, Elliot L. Cedar Waxwing (*Bombycilla cedrorum*). Poole A, Gill F, editors. *Birds North Am Online* [Internet] 2014; Available from: [http://bna.birds.cornell.edu/BNA/account/Cedar\\_Waxwing/RECOMMENDED\\_CITATION.html](http://bna.birds.cornell.edu/BNA/account/Cedar_Waxwing/RECOMMENDED_CITATION.html)
30. Khanna DR. *Biology of Birds* [Internet]. Discovery Publishing House; 2005 [cited 2015 Nov 13]. Available from: <https://books.google.com/books?id=fDbliChi7KwC&pgis=1> ISBN:817141933X
31. Gillihan SW. *Bird Conservation on Golf Courses: A Design and Management Manual* [Internet]. John Wiley & Sons; 2000 [cited 2015 Nov 2]. Available from: [https://books.google.com/books?id=8qOv\\_8kRyJgC&pgis=1](https://books.google.com/books?id=8qOv_8kRyJgC&pgis=1) ISBN:1575041138
32. Hussell DJ, Montgomerie R. Lapland Longspur (*Calcarius lapponicus*). Poole A, Gill F, editors. *Birds North Am Online* [Internet] 2002; Available from: [http://bna.birds.cornell.edu/BNA/account/Lapland\\_Longspur/RECOMMENDED\\_CITATION.html](http://bna.birds.cornell.edu/BNA/account/Lapland_Longspur/RECOMMENDED_CITATION.html)
33. Bleho B, Ellison K, Hill DP, Gould LK. Chestnut-collared Longspur (*Calcarius ornatus*). Poole A, Gill F, editors. *Birds North Am Online* [Internet] 2015; Available from: <http://bna.birds.cornell.edu/bna/species/288>
34. Brigham RM, Ng J, Poulin RG, Grindal SD. Common Nighthawk (*Chordeiles minor*). Poole A, Gill F, editors. *Birds North Am Online* [Internet] 2011; Available from: [http://bna.birds.cornell.edu/BNA/account/Common\\_Nighthawk/RECOMMENDED\\_CITATION.html](http://bna.birds.cornell.edu/BNA/account/Common_Nighthawk/RECOMMENDED_CITATION.html)
35. Payne RB. Indigo Bunting (*Passerina cyanea*). Poole A, Stettenheim P, Gill F, editors. *Birds North Am Online* [Internet] 2006;(4). Available from: [http://bna.birds.cornell.edu/BNA/account/Indigo\\_Bunting/RECOMMENDED\\_CITATION.html](http://bna.birds.cornell.edu/BNA/account/Indigo_Bunting/RECOMMENDED_CITATION.html)
36. Wyatt VE, Francis CM. Rose-breasted Grosbeak (*Pheucticus ludovicianus*). Poole A, Gill F, editors. *Birds North Am Online* [Internet] 2002; Available from: [http://bna.birds.cornell.edu/BNA/account/Rose-breasted\\_Grosbeak/RECOMMENDED\\_CITATION.html](http://bna.birds.cornell.edu/BNA/account/Rose-breasted_Grosbeak/RECOMMENDED_CITATION.html)
37. Cabrera-Cruz SA, Mabee TJ, Patraça RV. Using Theoretical Flight Speeds to Discriminate Birds from Insects in Radar Studies. *Condor* [Internet] 2013 May;115(2):263–272. Available from: <http://www.bioone.org/doi/abs/10.1525/cond.2013.110181> DOI:10.1525/cond.2013.110181
38. Odum EP, Kuenzler EJ. Measurement of Territory and Home Range Size in Birds. *Auk* [Internet] 1955 Apr [cited 2015 Nov 7];72(2):128–137. Available

- from: <http://www.jstor.org/stable/info/10.2307/4081419>
39. Mowbray TB. Scarlet Tanager (*Piranga olivacea*). Poole A, Gill F, editors. *Birds North Am Online* [Internet] 1999; Available from: [http://bna.birds.cornell.edu/BNA/account/Scarlet\\_Tanager/RECOMMENDED\\_CITATION.html](http://bna.birds.cornell.edu/BNA/account/Scarlet_Tanager/RECOMMENDED_CITATION.html)
  40. Temple S. Dickcissel (*Spiza americana*). Poole A, Gill F, editors. *Birds North Am Online* [Internet] 2002; Available from: [http://bna.birds.cornell.edu/BNA/account/Dickcissel/RECOMMENDED\\_CITATION.html](http://bna.birds.cornell.edu/BNA/account/Dickcissel/RECOMMENDED_CITATION.html)
  41. Wells KMS, Millsbaugh JJ, Ryan MR, Hubbard MW. Factors Affecting Home Range Size and Movements of Post-Fledging Grassland Birds. *Wilson J Ornithol* [Internet] The Wilson Ornithological Society; 2008 Mar [cited 2015 Nov 27];120(1):120–130. Available from: <http://dx.doi.org/10.1676/06-117.1> DOI:10.1676/06-117.1
  42. Buckley NJ. Food finding and the influence of information, local enhancement, and communal roosting on foraging success of North American vultures. *Auk* [Internet] 1996;113(2):473–488. Available from: <http://www.jstor.org/stable/4088913> DOI:10.2307/4088913
  43. Houston CS, Holroyd GL, Terry B, Blom M, Stoffel MJ. Tracking Saskatchewan Nestling Turkey Vultures. *Blue Jay* [Internet] 2007;65(4):201–207. Available from: [http://www.naturesask.ca/rsu\\_docs/tracking-saskatchewan-nestling-tv.pdf](http://www.naturesask.ca/rsu_docs/tracking-saskatchewan-nestling-tv.pdf) Archived at: <http://www.webcitation.org/6lCcxk17k4>
  44. Kirk DA, Mossman MJ. Turkey Vulture (*Cathartes aura*). Poole A, Gill F, editors. *Birds North Am Online* [Internet] 1998; Available from: <http://bna.birds.cornell.edu/bna/species/339>
  45. Poulin J-F, D'Astous E, Villard M-A, Hejl SJ, Newlon KR, Mcfadzen ME, et al. Brown Creeper (*Certhia americana*). Poole A, Gill F, editors. *Birds North Am Online* [Internet] 2013; Available from: [http://bna.birds.cornell.edu/BNA/account/Brown\\_Creeper/RECOMMENDED\\_CITATION.html](http://bna.birds.cornell.edu/BNA/account/Brown_Creeper/RECOMMENDED_CITATION.html)
  46. Lowther PE, Johnston RF. Rock Pigeon (*Columba livia*). Poole A, Stettenheim P, Gill F, editors. *Birds North Am Online* [Internet] 2013; Available from: [http://bna.birds.cornell.edu/BNA/account/Rock\\_Pigeon/RECOMMENDED\\_CITATION.html](http://bna.birds.cornell.edu/BNA/account/Rock_Pigeon/RECOMMENDED_CITATION.html)
  47. Baldaccini NE, Giunchi D, Mongini E, Ragionieri L. Foraging flights of wild rock doves (*Columba l. livia*) : a spatio-temporal analysis. *Ital J Zool* [Internet] 2000;67(4):371–377. Available from: <http://www.tandfonline.com/doi/abs/10.1080/11250000009356342> DOI:10.1080/11250000009356342
  48. Otis DL, Schulz JH, Miller D, Mirarchi RE, Baskett TS. Mourning Dove (*Zenaida macroura*). Poole A, Gill F, editors. *Birds North Am Online* [Internet] 2008; Available from: [http://bna.birds.cornell.edu/BNA/account/Mourning\\_Dove/RECOMMENDED\\_CITATION.html](http://bna.birds.cornell.edu/BNA/account/Mourning_Dove/RECOMMENDED_CITATION.html)
  49. Caccamise DF, Fischl J. Patterns of Association of Secondary Species in Roosts of European Starlings and Common Grackles. *Wilson Bull* [Internet] 1985;97(2):173–182. Available from: <http://www.jstor.org/stable/4162069>
  50. Marzluff JM, Angell T. In the Company of Crows and Ravens [Internet]. Yale University Press; 2008 [cited 2015 Nov 5]. Available from: <https://books.google.com/books?id=Bc5YO5PnPmMC&pgis=1> ISBN:0300135262
  51. Ward MP, Raim A, Yaremych-Hamer S, Lampman R, Novak RJ. Does the roosting behavior of birds affect transmission dynamics of West Nile virus? *Am J Trop Med Hyg* [Internet] 2006 Aug [cited 2015 Apr 21];75(2):350–5. Available from: <http://www.ncbi.nlm.nih.gov/pubmed/16896147> PMID: 16896147
  52. Verbeek NA, Caffrey C. American Crow (*Corvus brachyrhynchos*). Poole A, Gill F, editors. *Birds North Am Online* [Internet] 2002; Available from: <http://bna.birds.cornell.edu/bna/species/647>
  53. Boarman WI, Heinrich B. Common Raven (*Corvus corax*). Poole A, Gill F, editors. *Birds North Am Online* [Internet] 1999; Available from: [http://bna.birds.cornell.edu/BNA/account/Common\\_Raven/RECOMMENDED\\_CITATION.html](http://bna.birds.cornell.edu/BNA/account/Common_Raven/RECOMMENDED_CITATION.html)
  54. Smith KG, Tarvin KA, Woolfenden GE. Blue Jay (*Cyanocitta cristata*). Poole A, Gill F, editors. *Birds North Am Online* [Internet] 2013; Available from: [http://bna.birds.cornell.edu/BNA/account/Blue\\_Jay/RECOMMENDED\\_CITATION.html](http://bna.birds.cornell.edu/BNA/account/Blue_Jay/RECOMMENDED_CITATION.html)
  55. Texas Parks and Wildlife Department. Animal Speeds [Internet]. [cited 2015 Nov 6]. Available from: [http://tpwd.texas.gov/publications/nonpwdpubs/young\\_naturalist/animals/animal\\_speeds/index.phtml](http://tpwd.texas.gov/publications/nonpwdpubs/young_naturalist/animals/animal_speeds/index.phtml). Archived at: <http://www.webcitation.org/6lCxGHXZ7>
  56. Bowman J. Is dispersal distance of birds proportional to territory size? *Can J Zool* [Internet] 2003 Feb;81(2):195–202. Available from: <http://www.nrcresearchpress.com/doi/abs/10.1139/z02-237> DOI:10.1139/z02-237
  57. Strickland D, Ouellet H. Gray Jay (*Perisoreus canadensis*). Poole A, Stettenheim P, Gill F, editors. *Birds North Am Online* [Internet] 2011; Available from: [http://bna.birds.cornell.edu/BNA/account/Gray\\_Jay/RECOMMENDED\\_CITATION.html](http://bna.birds.cornell.edu/BNA/account/Gray_Jay/RECOMMENDED_CITATION.html)
  58. Tobalske BW, Olson NE, Dial KP. Flight style of the black-billed magpie: variation in wing kinematics, neuromuscular control, and muscle composition. *J Exp Zool* [Internet] 1997 Nov 1 [cited 2015 Nov 27];279(4):313–29. Available from: <http://www.ncbi.nlm.nih.gov/pubmed/9360313> PMID: 9360313
  59. Trost CH. Black-billed Magpie (*Pica hudsonia*). Poole A, Gill F, editors. *Birds North Am Online* [Internet] 1999; Available from: [http://bna.birds.cornell.edu/BNA/account/Black-billed\\_Magpie/RECOMMENDED\\_CITATION.html](http://bna.birds.cornell.edu/BNA/account/Black-billed_Magpie/RECOMMENDED_CITATION.html)
  60. Hughes JM. Yellow-billed Cuckoo (*Coccyzus americanus*). Poole A, Gill F, editors. *Birds North Am Online* [Internet] 2015; Available from: [http://bna.birds.cornell.edu/BNA/account/Yellow-billed\\_Cuckoo/RECOMMENDED\\_CITATION.html](http://bna.birds.cornell.edu/BNA/account/Yellow-billed_Cuckoo/RECOMMENDED_CITATION.html)
  61. Hughes JM. Black-billed Cuckoo (*Coccyzus erythrophthalmus*). Poole A, Gill F, editors. *Birds North Am Online* [Internet] 2001; Available from: [http://bna.birds.cornell.edu/BNA/account/Black-billed\\_Cuckoo/RECOMMENDED\\_CITATION.html](http://bna.birds.cornell.edu/BNA/account/Black-billed_Cuckoo/RECOMMENDED_CITATION.html)
  62. Lowther PE 2005. Le Conte's Sparrow (*Ammodramus leconteii*). Poole A, editor. *Birds North Am Online* [Internet] 2005; Available from:

- [http://bna.birds.cornell.edu/BNA/account/Le\\_Contes\\_Sparrow/RECOMMENDED\\_CITATION.html](http://bna.birds.cornell.edu/BNA/account/Le_Contes_Sparrow/RECOMMENDED_CITATION.html)
63. Green MT, Lowther PE, Jones SL, Davis SK, Dale BC. Baird's Sparrow (*Ammodramus bairdii*). Poole A, Gill F, editors. *Birds North Am Online* [Internet] 2002; Available from: [http://bna.birds.cornell.edu/BNA/account/Bairds\\_Sparrow/RECOMMENDED\\_CITATION.html](http://bna.birds.cornell.edu/BNA/account/Bairds_Sparrow/RECOMMENDED_CITATION.html)
  64. Baldwin HQ, Jeske CW, Powell MA, Chadwick PC, Barrow WC. Home-Range Size and Site Tenacity of Overwintering Le Conte's Sparrows in a Fire Managed Prairie. *Wilson J Ornithol* [Internet] 2010 Mar [cited 2015 Nov 6];122(1):139–145. Available from: <http://www.bioone.org/doi/abs/10.1676/08-160.1> DOI:10.1676/08-160.1
  65. Delany MF, Moore CT, Hamblen JM. Florida grasshopper sparrow management needs [Internet]. Final Rep to Florida Game Fresh Water Fish Comm Tallahassee, Florida. 1992 [cited 2015 Nov 6]. Available from: [http://s3.amazonaws.com/file-storage.INDIVIDUAL-ACTIVITIES-CooperativeResearchUnits.digitalmeasures.usgs.edu/cmoore/tech\\_publications/Delany\\_et\\_al\\_\(1992\)\\_FGS\\_Final\\_Report-1.pdf](http://s3.amazonaws.com/file-storage.INDIVIDUAL-ACTIVITIES-CooperativeResearchUnits.digitalmeasures.usgs.edu/cmoore/tech_publications/Delany_et_al_(1992)_FGS_Final_Report-1.pdf). Archived at: <http://www.webcitation.org/6lCxp46eH>
  66. Vickery PD. Grasshopper Sparrow (*Ammodramus savannarum*). Poole A, Gill F, editors. *Birds North Am Online* [Internet] 1996; Available from: [http://bna.birds.cornell.edu/BNA/account/Grasshopper\\_Sparrow/RECOMMENDED\\_CITATION.html](http://bna.birds.cornell.edu/BNA/account/Grasshopper_Sparrow/RECOMMENDED_CITATION.html)
  67. Martin JW, Parrish JR. Lark Sparrow (*Chondestes grammacus*). Poole A, Gill F, editors. *Birds North Am Online* [Internet] 2000; Available from: [http://bna.birds.cornell.edu/BNA/account/Lark\\_Sparrow/RECOMMENDED\\_CITATION.html](http://bna.birds.cornell.edu/BNA/account/Lark_Sparrow/RECOMMENDED_CITATION.html)
  68. Nolan, Jr. V, Ketterson ED, Cristol DA, Rogers CM, Clotfelter ED, Titus RC, et al. Dark-eyed Junco (*Junco hyemalis*). Poole A, Gill F, editors. *Birds North Am Online* [Internet] 2002; Available from: [http://bna.birds.cornell.edu/BNA/account/Dark-eyed\\_Junco/RECOMMENDED\\_CITATION.html](http://bna.birds.cornell.edu/BNA/account/Dark-eyed_Junco/RECOMMENDED_CITATION.html)
  69. Mowbray TB. Swamp Sparrow (*Melospiza georgiana*). Poole A, Gill F, editors. *Birds North Am Online* [Internet] 1997; Available from: [http://bna.birds.cornell.edu/BNA/account/Swamp\\_Sparrow/RECOMMENDED\\_CITATION.html](http://bna.birds.cornell.edu/BNA/account/Swamp_Sparrow/RECOMMENDED_CITATION.html)
  70. DeGraaf RM. Technical Guide to Forest Wildlife Habitat Management in New England [Internet]. UPNE; 2006 [cited 2015 Nov 2]. Available from: <https://books.google.com/books?id=hwsI9mWPNS4C&pgis=1> ISBN:1584655879
  71. Ammon EM. Lincoln's Sparrow (*Melospiza lincolni*). Poole A, Gill F, editors. *Birds North Am Online* [Internet] 1995; Available from: [http://bna.birds.cornell.edu/BNA/account/Lincolns\\_Sparrow/RECOMMENDED\\_CITATION.html](http://bna.birds.cornell.edu/BNA/account/Lincolns_Sparrow/RECOMMENDED_CITATION.html)
  72. Arcese P, Sogge MK, Marr AB, Patten MA. Song Sparrow (*Melospiza melodia*). Poole A, Gill F, editors. *Birds North Am Online* [Internet] 2002; Available from: [http://bna.birds.cornell.edu/BNA/account/Song\\_Sparrow/RECOMMENDED\\_CITATION.html](http://bna.birds.cornell.edu/BNA/account/Song_Sparrow/RECOMMENDED_CITATION.html)
  73. DeGraaf RM, Yamasaki M. New England Wildlife: Habitat, Natural History, and Distribution [Internet]. UPNE; 2001 [cited 2015 Nov 7]. Available from: <https://books.google.com/books?id=mOewbhHSET4C&pgis=1> ISBN:0874519578
  74. Ginter DL, Desmond MJ. Influence of foraging and roosting behavior on home-range size and movement patterns of Savannah Sparrows wintering in south Texas. *Wilson Bull* [Internet] The Wilson Ornithological Society; 2005 Mar [cited 2015 Nov 7];117(1):63–71. Available from: <http://www.bioone.org/doi/abs/10.1676/04-017> DOI:10.1676/04-017
  75. Wheelwright NT, Rising JD. Savannah Sparrow (*Passerculus sandwichensis*). Poole A, Gill F, editors. *Birds North Am Online* [Internet] 2008; Available from: [http://bna.birds.cornell.edu/BNA/account/Savannah\\_Sparrow/RECOMMENDED\\_CITATION.html](http://bna.birds.cornell.edu/BNA/account/Savannah_Sparrow/RECOMMENDED_CITATION.html)
  76. Greenlaw JS. Eastern Towhee (*Pipilo erythrophthalmus*). Poole A, Gill F, editors. *Birds North Am Online* [Internet] 2015; Available from: [http://bna.birds.cornell.edu/BNA/account/Eastern\\_Towhee/RECOMMENDED\\_CITATION.html](http://bna.birds.cornell.edu/BNA/account/Eastern_Towhee/RECOMMENDED_CITATION.html)
  77. Bartos Smith S, Greenlaw JS. Spotted Towhee (*Pipilo maculatus*). Poole A, Gill F, editors. *Birds North Am Online* [Internet] 2015; Available from: [http://bna.birds.cornell.edu/BNA/account/Spotted\\_Towhee/RECOMMENDED\\_CITATION.html](http://bna.birds.cornell.edu/BNA/account/Spotted_Towhee/RECOMMENDED_CITATION.html)
  78. Dobkin D, Mewaldt L, Duke R, Granholm S. SPOTTED TOWHEE *Pipilo maculatus*. In: Zeiner DC, Jr. WFL, Mayer KE, White M, editors. *Calif Wildl Habitat Relationships Vol I-III*. Sacramento, California: California Depart. of Fish and Game; 1990.
  79. Baker MC, Mewaldt LR. The use of space by white-crowned sparrows: Juvenile and adult ranging patterns and home range versus body size comparisons in an avian granivore community. *Behav Ecol Sociobiol* [Internet] 1979;6(1):45–52. Available from: <http://link.springer.com/article/10.1007/BF00293244> DOI:10.1007/BF00293244
  80. Macías-Duarte A, Panjabi AO. Home range and habitat use of wintering Vesper Sparrows in grasslands of the Chihuahuan Desert in Mexico. *Wilson J Ornithol* [Internet] The Wilson Ornithological Society; 2013 Dec [cited 2015 Nov 7];125(4):755–762. Available from: <http://dx.doi.org/10.1676/13-043.1>
  81. Jones SL, Cornely JE. Vesper Sparrow (*Pooecetes gramineus*). Poole A, Gill F, editors. *Birds North Am Online* [Internet] 2002; Available from: [http://bna.birds.cornell.edu/BNA/account/Vesper\\_Sparrow/RECOMMENDED\\_CITATION.html](http://bna.birds.cornell.edu/BNA/account/Vesper_Sparrow/RECOMMENDED_CITATION.html)
  82. Grant TA, Knapton RW. Clay-colored Sparrow (*Spizella pallida*). Poole A, Gill F, editors. *Birds North Am Online* [Internet] 2012; Available from: [http://bna.birds.cornell.edu/BNA/account/Clay-colored\\_Sparrow/RECOMMENDED\\_CITATION.html](http://bna.birds.cornell.edu/BNA/account/Clay-colored_Sparrow/RECOMMENDED_CITATION.html)
  83. Middleton AL. Chipping Sparrow (*Spizella passerina*). Poole A, Gill F, editors. *Birds North Am Online* [Internet] 1998; Available from: [http://bna.birds.cornell.edu/BNA/account/Chipping\\_Sparrow/RECOMMENDED\\_CITATION.html](http://bna.birds.cornell.edu/BNA/account/Chipping_Sparrow/RECOMMENDED_CITATION.html)
  84. Falls JB, Kopachena JG. White-throated Sparrow (*Zonotrichia albicollis*). Poole A, Gill F, editors. *Birds North Am Online* [Internet] 2010; Available from: [http://bna.birds.cornell.edu/BNA/account/White-throated\\_Sparrow/RECOMMENDED\\_CITATION.html](http://bna.birds.cornell.edu/BNA/account/White-throated_Sparrow/RECOMMENDED_CITATION.html)

85. Becker DM, Sieg CH. Home range and habitat utilization of breeding male Merlins, *Falco columbarius*, in southeastern Montana. *Can Field-Naturalist* [Internet] 1987;101:398–403. Available from: [http://www.fs.fed.us/rm/pubs\\_other/rmrs\\_1987\\_sieg\\_c002.pdf](http://www.fs.fed.us/rm/pubs_other/rmrs_1987_sieg_c002.pdf)
86. Warkentin IG, Sodhi NS, Espie RHM, Poole AF, Oliphant LW, James PC. Merlin (*Falco columbarius*). Poole A, editor. *Birds North Am Online* [Internet] 2005; Available from: [http://bna.birds.cornell.edu/BNA/account/Merlin/RECOMMENDED\\_CITATION.html](http://bna.birds.cornell.edu/BNA/account/Merlin/RECOMMENDED_CITATION.html)
87. Smallwood JA, Bird DM. American Kestrel (*Falco sparverius*). Poole A, Gill F, editors. *Birds North Am Online* [Internet] 2002; Available from: [http://bna.birds.cornell.edu/BNA/account/American\\_Kestrel/RECOMMENDED\\_CITATION.html](http://bna.birds.cornell.edu/BNA/account/American_Kestrel/RECOMMENDED_CITATION.html)
88. Wauer R. How Fast Do Birds Fly? [Internet]. *Nat Writ Texas*. 2007 [cited 2015 Nov 5]. Available from: <http://texasnature.blogspot.ca/2007/02/how-fast-do-birds-fly-by-ro-wauer-on.html>. Archived at: <http://www.webcitation.org/6ID0TD9vI>
89. Dhondt AA, Driscoll MJL, Swarthout ECH. House Finch *Carpodacus mexicanus* roosting behaviour during the non-breeding season and possible effects of mycoplasmal conjunctivitis. *Ibis (Lond 1859)* [Internet] 2007;149(1):1–9. Available from: <http://doi.wiley.com/10.1111/j.1474-919X.2006.00588.x> DOI:10.1111/j.1474-919x.2006.00588.x
90. Tobalske B, Peacock W, Dial K. Kinematics of flap-bounding flight in the zebra finch over a wide range of speeds. *J Exp Biol* [Internet] 1999 Jul [cited 2015 Nov 6];202 (Pt 13):1725–39. Available from: <http://www.ncbi.nlm.nih.gov/pubmed/10359676> PMID: 10359676
91. Badyaev A V, Belloni V, Hill GE. House Finch (*Carpodacus mexicanus*). Poole A, Gill F, editors. *Birds North Am Online* [Internet] 2012; Available from: [http://bna.birds.cornell.edu/BNA/account/House\\_Finch/RECOMMENDED\\_CITATION.html](http://bna.birds.cornell.edu/BNA/account/House_Finch/RECOMMENDED_CITATION.html)
92. Herman J, McGarry M. Examination of home range in male purple finches (*Carpodacus purpureus*) [Internet]. *Itasca Biol Stn Student Pap*. 2011. Available from: <http://hdl.handle.net/11299/99539>
93. Wootton JT. Purple Finch (*Carpodacus purpureus*). Poole A, Gill F, editors. *Birds North Am Online* [Internet] 1996; Available from: [http://bna.birds.cornell.edu/BNA/account/Purple\\_Finch/RECOMMENDED\\_CITATION.html](http://bna.birds.cornell.edu/BNA/account/Purple_Finch/RECOMMENDED_CITATION.html)
94. Gillihan SW, Byers B. Evening Grosbeak (*Coccothraustes vespertinus*). Poole A, Gill F, editors. *Birds North Am Online* [Internet] 2001; Available from: [http://bna.birds.cornell.edu/BNA/account/Evening\\_Grosbeak/RECOMMENDED\\_CITATION.html](http://bna.birds.cornell.edu/BNA/account/Evening_Grosbeak/RECOMMENDED_CITATION.html)
95. Dobkin D, Granholm S, Mewaldt L, Duke R. EVENING GROSBEAK *Coccothraustes vespertinus*. In: Zeiner DC, Jr. WFL, Mayer KE, White M, editors. *Calif Wildl Habitat Relationships Vol I-III*. Sacramento, California: California Depart. of Fish and Game; 1990.
96. Meinertzhagen R. Speed and Altitude of Bird Flight (With Notes on Other Animals). *Ibis (Lond 1859)* [Internet] 2008 Apr 3;97(1):81–117. Available from: <http://doi.wiley.com/10.1111/j.1474-919X.1955.tb03020.x> DOI:10.1111/j.1474-919X.1955.tb03020.x
97. Adkisson CS. Red Crossbill (*Loxia curvirostra*). Poole A, Gill F, editors. *Birds North Am Online* [Internet] 1996; Available from: [http://bna.birds.cornell.edu/BNA/account/Red\\_Crossbill/RECOMMENDED\\_CITATION.html](http://bna.birds.cornell.edu/BNA/account/Red_Crossbill/RECOMMENDED_CITATION.html)
98. Ellegren H. Speed of migration and migratory flight lengths of passerine birds ringed during autumn migration in Sweden. *Ornis Scand* 1993;24(3):220–228.
99. Benkman CW. White-winged Crossbill (*Loxia leucoptera*). Poole A, Stettenheim P, Gill F, editors. *Birds North Am Online* [Internet] 2012; Available from: <http://dx.doi.org/10.12173/bna.27>
100. Dawson WR. Pine Siskin (*Carduelis pinus*). Poole A, Gill F, editors. *Birds North Am Online* [Internet] 2014; Available from: [http://bna.birds.cornell.edu/BNA/account/Pine\\_Siskin/RECOMMENDED\\_CITATION.html](http://bna.birds.cornell.edu/BNA/account/Pine_Siskin/RECOMMENDED_CITATION.html)
101. Videler JJ. *Avian Flight* [Internet]. *Evolution (N Y)*. 2005. Available from: <http://books.google.com/books?id=5Xr9NZdggP0C&pgis=1> ISBN:0199299927, 9780199299928
102. Coutlee EL. Agonistic Behavior in the American Goldfinch. *Wilson Bull* [Internet] 1967;79(1):89–109. Available from: <https://sora.unm.edu/sites/default/files/journals/wilson/v079n01/p0089-p0109.pdf>
103. McGraw KJ, Middleton AL. American Goldfinch (*Carduelis tristis*). Poole A, Gill F, editors. *Birds North Am Online* [Internet] 2009; Available from: [http://bna.birds.cornell.edu/BNA/account/American\\_Goldfinch/RECOMMENDED\\_CITATION.html](http://bna.birds.cornell.edu/BNA/account/American_Goldfinch/RECOMMENDED_CITATION.html)
104. Brown C, Brown MB. Barn Swallow (*Hirundo rustica*) [Internet]. *Birds North Am Online*. 1999. Available from: <http://bna.birds.cornell.edu/bna/species/452/articles/introduction>
105. Blake RW, Kolotylo R, Cueva H de la. Flight speeds of the barn swallow, *Hirundo rustica*. *Can J Zool* [Internet] NRC Research Press Ottawa, Canada; 1990 Jan 14 [cited 2015 Nov 6];68(1):1–5. Available from: <http://www.nrcresearchpress.com/doi/abs/10.1139/z90-001> DOI:10.1139/z90-001
106. Heagy A, Badzinski D, Bradley D, Falconer M, McCracken J, Reid RA, et al. Recovery Strategy for the Barn Swallow (*Hirundo rustica*) in Ontario [Internet]. Peterborough, Ontario; 2014. Available from: [http://files.ontario.ca/environment-and-energy/species-at-risk/mnr\\_sar\\_rs\\_brn\\_sw1\\_en.pdf](http://files.ontario.ca/environment-and-energy/species-at-risk/mnr_sar_rs_brn_sw1_en.pdf). Archived at: <http://www.webcitation.org/6lCy1x6eO>
107. Shelton RM, Jackson BE, Hedrick TL. The mechanics and behavior of cliff swallows during tandem flights. *J Exp Biol* [Internet] 2014 Aug 1;217(15):2717–2725. Available from: <http://jeb.biologists.org/cgi/doi/10.1242/jeb.101329> DOI:10.1242/jeb.101329
108. Brown CR, Brown MB. Cliff Swallow (*Petrochelidon pyrrhonota*). Poole A, Gill F, editors. *Birds North Am Online* [Internet] 1995; Available from: [http://bna.birds.cornell.edu/BNA/account/Cliff\\_Swallow/RECOMMENDED\\_CITATION.html](http://bna.birds.cornell.edu/BNA/account/Cliff_Swallow/RECOMMENDED_CITATION.html)
109. Russell KR, Gauthreaux S a. Spatial and temporal dynamics of a Purple Martin pre-migratory roost. *Wilson Bull* [Internet] 1999;111(3):354–362.

- Available from: <http://www.jstor.org/stable/4164099>
110. Purple Martin Conservation Association. Purple Martin Terminology [Internet]. [cited 2016 Jan 23]. Available from: <https://www.purplemartin.org/purple-martins/biology/41/terminology/> Archived at: <http://www.webcitation.org/6lD1ZVpja>
  111. Tarof S, Brown CR. Purple Martin (*Progne subis*). Poole A, Gill F, editors. *Birds North Am Online* [Internet] 2013; Available from: <http://bna.birds.cornell.edu/bna/species/287>
  112. Garrison BA 1999. Bank Swallow (*Riparia riparia*). Poole A, Gill F, editors. *Birds North Am Online* [Internet] 1999; Available from: [http://bna.birds.cornell.edu/BNA/account/Bank\\_Swallow/RECOMMENDED\\_CITATION.html](http://bna.birds.cornell.edu/BNA/account/Bank_Swallow/RECOMMENDED_CITATION.html)
  113. De Jong MJ. Northern Rough-winged Swallow (*Stelgidopteryx serripennis*). Poole A, Gill F, editors. *Birds North Am Online* [Internet] 1996; Available from: [http://bna.birds.cornell.edu/BNA/account/Northern\\_Rough-winged\\_Swallow/RECOMMENDED\\_CITATION.html](http://bna.birds.cornell.edu/BNA/account/Northern_Rough-winged_Swallow/RECOMMENDED_CITATION.html)
  114. Winkler DW, Hallinger KK, Ardia DR, Robertson RJ, Stutchbury BJ, Cohen RR. Tree Swallow (*Tachycineta bicolor*). Poole A, Stettenheim P, Gill F, editors. *Birds North Am Online* [Internet] 2011; Available from: [http://bna.birds.cornell.edu/BNA/account/Tree\\_Swallow/RECOMMENDED\\_CITATION.html](http://bna.birds.cornell.edu/BNA/account/Tree_Swallow/RECOMMENDED_CITATION.html)
  115. Kolotylo RA. Flight Speeds and Energetics of Seven Bird Species [Internet] [M.ScThesis]. University of British Columbia; 1989. Available from: [https://circle.ubc.ca/bitstream/id/92363/UBC\\_1989\\_A6\\_7](https://circle.ubc.ca/bitstream/id/92363/UBC_1989_A6_7) Archived at: <http://www.webcitation.org/6lD1sFkhh>
  116. Meanley B. The Roosting Behavior of the Red-Winged Black-Bird in the Southern United States. *Wilson Bull* [Internet] 1965;77(3):218–228. Available from: <http://sora.unm.edu/sites/default/files/journals/wilson/v077n03/p0217-p0228.pdf>
  117. Illinois Natural History Survey. Red-winged blackbird [Internet]. [cited 2015 Nov 6]. Available from: <http://www.inhs.illinois.edu/collections/birds/ilbirds/56/> Archived at: <http://www.webcitation.org/6lD21SkZV>
  118. Yasukawa K, Searcy WA. Red-winged Blackbird (*Agelaius phoeniceus*). Poole A, Gill F, editors. *Birds North Am Online* [Internet] 1995; Available from: [http://bna.birds.cornell.edu/BNA/account/Red-winged\\_Blackbird/RECOMMENDED\\_CITATION.html](http://bna.birds.cornell.edu/BNA/account/Red-winged_Blackbird/RECOMMENDED_CITATION.html)
  119. Pettingill OS. Ornithology in Laboratory and Field [Internet]. Elsevier; 2013 [cited 2015 Nov 6]. Available from: <https://books.google.com/books?id=livLBAAQBAJ&pgis=1> ISBN:1483263118
  120. Renfrew R, Strong AM, Perlut NG, Martin SG, Gavin TA. Bobolink (*Dolichonyx oryzivorus*). Poole A, Gill F, editors. *Birds North Am Online* [Internet] 2015; Available from: <http://bna.birds.cornell.edu/bna/species/176>
  121. Wiens JA. An Approach to the Study of Ecological Relationships among Grassland Birds. *Ornithol Monogr* [Internet] 1969 Jan [cited 2015 Nov 19]; (8):1–93. Available from: <http://www.jstor.org/stable/info/10.2307/40166677>
  122. Avery ML. Rusty Blackbird (*Euphagus carolinus*). Poole A, Gill F, editors. *Birds North Am Online* [Internet] 2013; Available from: [http://bna.birds.cornell.edu/BNA/account/Rusty\\_Blackbird/RECOMMENDED\\_CITATION.html](http://bna.birds.cornell.edu/BNA/account/Rusty_Blackbird/RECOMMENDED_CITATION.html)
  123. Williams L. Breeding Behavior of the Brewer Blackbird. *Condor* [Internet] 1952;54(1):3–47. Available from: [http://www.jstor.org/stable/1364526?seq=1#page\\_scan\\_tab\\_contents](http://www.jstor.org/stable/1364526?seq=1#page_scan_tab_contents)
  124. Martin SG. Brewer's Blackbird (*Euphagus cyanocephalus*). Poole A, Gill F, editors. *Birds North Am Online* [Internet] 2002; Available from: [http://bna.birds.cornell.edu/BNA/account/Brewers\\_Blackbird/RECOMMENDED\\_CITATION.html](http://bna.birds.cornell.edu/BNA/account/Brewers_Blackbird/RECOMMENDED_CITATION.html)
  125. Granholm S, Mewaldt L, Duke R. BREWER'S BLACKBIRD *Euphagus cyanocephalus*. In: Zeiner DC, Jr. WFL, Mayer KE, White M, editors. *Calif Wildl Habitat Relationships Vol I-III*. Sacramento, California: California Depart. of Fish and Game; 1990.
  126. Rising JD, Flood NJ. Baltimore Oriole (*Icterus galbula*). Poole A, Gill F, editors. *Birds North Am Online* [Internet] 1998; Available from: [http://bna.birds.cornell.edu/BNA/account/Baltimore\\_Oriole/RECOMMENDED\\_CITATION.html](http://bna.birds.cornell.edu/BNA/account/Baltimore_Oriole/RECOMMENDED_CITATION.html)
  127. Scharf WC, Kren J. Orchard Oriole (*Icterus spurius*). Poole A, Gill F, editors. *Birds North Am Online* [Internet] 2010; Available from: [http://bna.birds.cornell.edu/BNA/account/Orchard\\_Oriole/RECOMMENDED\\_CITATION.html](http://bna.birds.cornell.edu/BNA/account/Orchard_Oriole/RECOMMENDED_CITATION.html)
  128. Rothstein SI, Verner J, Steven E. Radio-Tracking Confirms a Unique Diurnal Pattern of Spatial Occurrence in the Parasitic Brown-Headed Cowbird. *Ecology* [Internet] 1984 [cited 2015 Nov 20];65(1):77–88. Available from: <http://www.jstor.org/stable/1939460>
  129. Lowther PE. Brown-headed Cowbird (*Molothrus ater*). Poole A, Gill F, editors. *Birds North Am Online* [Internet] 1993; Available from: [http://bna.birds.cornell.edu/BNA/account/Brown-headed\\_Cowbird/RECOMMENDED\\_CITATION.html](http://bna.birds.cornell.edu/BNA/account/Brown-headed_Cowbird/RECOMMENDED_CITATION.html)
  130. Bray OE, Royall WCJ, Guarino JL, Johnson RE. Activities of radio-equipped Common Grackles during fall migration. *Wilson Bull* [Internet] 1979;91(1):78–87. Available from: <https://sora.unm.edu/sites/default/files/journals/wilson/v091n01/p0078-p0087.pdf>
  131. Peer BD, Bollinger EK. Common Grackle (*Quiscalus quiscula*). Poole A, Gill F, editors. *Birds North Am Online* [Internet] 1997; Available from: [http://bna.birds.cornell.edu/BNA/account/Common\\_Grackle/RECOMMENDED\\_CITATION.html](http://bna.birds.cornell.edu/BNA/account/Common_Grackle/RECOMMENDED_CITATION.html)
  132. Davis SK, Lanyon WE. Western Meadowlark (*Sturnella neglecta*). Poole A, Gill F, editors. *Birds North Am Online* [Internet] 2008; Available from: [http://bna.birds.cornell.edu/BNA/account/Western\\_Meadowlark/RECOMMENDED\\_CITATION.html](http://bna.birds.cornell.edu/BNA/account/Western_Meadowlark/RECOMMENDED_CITATION.html)
  133. Twedt DJ, Crawford. RD. Yellow-headed Blackbird (*Xanthocephalus xanthocephalus*). Poole A, Gill F, editors. *Birds North Am Online* [Internet] 1995; Available from: [http://bna.birds.cornell.edu/BNA/account/Yellow-headed\\_Blackbird/RECOMMENDED\\_CITATION.html](http://bna.birds.cornell.edu/BNA/account/Yellow-headed_Blackbird/RECOMMENDED_CITATION.html)
  134. Granholm S, Mewaldt L, Duke R. YELLOW-HEADED BLACKBIRD *Xanthocephalus xanthocephalus*. In: Zeiner DC, Jr. WFL, Mayer KE, White M,

- editors. Calif Wildl Habitat Relationships Vol I-III. Sacramento, California: California Depart. of Fish and Game; 1990.
135. Granholm S, Mewaldt L, Duke R. *LOGGERHEAD SHRIKE* *Lanius ludovicianus*. In: Zeiner DC, Jr. WFL, Mayer KE, White M, editors. Calif Wildl Habitat Relationships Vol I-III. Sacramento, California: California Depart. of Fish and Game; 1990.
  136. Yosef R. *Loggerhead Shrike (Lanius ludovicianus)*. Poole A, Gill F, editors. *Birds North Am Online* [Internet] 1996; Available from: [http://bna.birds.cornell.edu/BNA/account/Loggerhead\\_Shrike/RECOMMENDED\\_CITATION.html](http://bna.birds.cornell.edu/BNA/account/Loggerhead_Shrike/RECOMMENDED_CITATION.html)
  137. Smith RJ, Hatch MI, Cimprich DA, Moore FR. *Gray Catbird (Dumetella carolinensis)*. Poole A, Gill F, editors. *Birds North Am Online* [Internet] 2011; Available from: [http://bna.birds.cornell.edu/BNA/account/Gray\\_Catbird/RECOMMENDED\\_CITATION.html](http://bna.birds.cornell.edu/BNA/account/Gray_Catbird/RECOMMENDED_CITATION.html)
  138. Farnsworth G, Londono GA, Martin JU, DERRICKSON KC, BREITWISCH R. *Northern Mockingbird (Mimus polyglottos)*. Poole A, Stettenheim P, Gill F, editors. *Birds North Am Online* [Internet] 2011;(7). Available from: [http://bna.birds.cornell.edu/BNA/account/Northern\\_Mockingbird/RECOMMENDED\\_CITATION.html](http://bna.birds.cornell.edu/BNA/account/Northern_Mockingbird/RECOMMENDED_CITATION.html)
  139. Dobkin D, Mewaldt L, Duke R. *NORTHERN MOCKINGBIRD* *Mimus polyglottos*. In: Zeiner DC, Jr. WFL, Mayer KE, White M, editors. Calif Wildl Habitat Relationships Vol I-III. Sacramento, California: California Depart. of Fish and Game; 1990.
  140. Cavitt JF, Haas CA. *Brown Thrasher (Toxostoma rufum)*. Poole A, Gill F, editors. *Birds North Am Online* [Internet] 2014; Available from: [http://bna.birds.cornell.edu/BNA/account/Brown\\_Thrasher/RECOMMENDED\\_CITATION.html](http://bna.birds.cornell.edu/BNA/account/Brown_Thrasher/RECOMMENDED_CITATION.html)
  141. Eastman J. *The Eastman Guide to Birds: Natural History Accounts for 150 North American Species* [Internet]. Stackpole Books; 2000 [cited 2015 Nov 30]. Available from: <https://books.google.com/books?id=4s039PKpc4kC&pgis=1> ISBN:08117452X
  142. Robbins MB. *Display Behavior of Male Sprague's Pipits*. *Wilson Bull* [Internet] 1998 [cited 2015 Nov 12];110(3):435–438. Available from: <http://www.jstor.org/stable/4163976>
  143. Davis SK, Robbins MB, Dale BC. *Sprague's Pipit (Anthus spragueii)*. Poole A, Gill F, editors. *Birds North Am Online* [Internet] 2014; Available from: [http://bna.birds.cornell.edu/BNA/account/Spragues\\_Pipit/RECOMMENDED\\_CITATION.html](http://bna.birds.cornell.edu/BNA/account/Spragues_Pipit/RECOMMENDED_CITATION.html)
  144. Poole AF, Bierregaard RO, Martell MS. *Osprey (Pandion haliaetus)*. Poole A, Gill F, editors. *Birds North Am Online* [Internet] 2002; Available from: [http://bna.birds.cornell.edu/BNA/account/Osprey/RECOMMENDED\\_CITATION.html](http://bna.birds.cornell.edu/BNA/account/Osprey/RECOMMENDED_CITATION.html)
  145. Foote JR, Mennill DJ, Ratcliffe LM, Smith SM. *Black-capped Chickadee (Poecile atricapillus)*. Poole A, Stettenheim P, Gill F, editors. *Birds North Am Online* [Internet] 2010; Available from: [http://bna.birds.cornell.edu/BNA/account/Black-capped\\_Chickadee/RECOMMENDED\\_CITATION.html](http://bna.birds.cornell.edu/BNA/account/Black-capped_Chickadee/RECOMMENDED_CITATION.html)
  146. Greenewalt CH. *The flight of the Black-capped Chickadee and the White-breasted Nuthatch*. *Auk* [Internet] 1955 [cited 2015 Nov 6];72:1–5. Available from: <https://sora.unm.edu/sites/default/files/journals/auk/v072n01/p0001-p0005.pdf>
  147. Odum EP. *Annual Cycle of the Black-Capped Chickadee: 3*. *Auk* [Internet] 1942 Oct [cited 2015 Nov 30];59(4):499–531. Available from: <http://www.jstor.org/stable/info/10.2307/4079461>
  148. Hadley A, Desrochers A. *Winter Habitat Use by Boreal Chickadee Flocks in a Managed Forest*. *Wilson J Ornithol* [Internet] 2008 [cited 2015 Nov 30];120(1):139–145. Available from: <http://theses.ulaval.ca/archimede/fichiers/23847/ch02.html#d0e269>
  149. Ficken MS, McLaren MA, Hailman JP. *Boreal Chickadee (Poecile hudsonica)*. Poole A, Gill F, editors. *Birds North Am Online* [Internet] 1996; Available from: [http://bna.birds.cornell.edu/BNA/account/Boreal\\_Chickadee/RECOMMENDED\\_CITATION.html](http://bna.birds.cornell.edu/BNA/account/Boreal_Chickadee/RECOMMENDED_CITATION.html)
  150. Savignac C. *COSEWIC assessment and status report on the Canada warbler, *Wilsonia canadensis**, in *Canad* [Internet]. *Libr Arch Canada Electron Collect*. 2008 [cited 2015 Nov 17]. Available from: [http://epe.lac-bac.gc.ca/100/200/301/environment\\_can/cws-scf/cosewic-cosepac/canada\\_warbler-e/CW69-14-548-2008E.pdf](http://epe.lac-bac.gc.ca/100/200/301/environment_can/cws-scf/cosewic-cosepac/canada_warbler-e/CW69-14-548-2008E.pdf) Archived at: <http://www.webcitation.org/6lD2aBxNQ>
  151. Reitsma L, Goodnow M, Hallworth MT, Conway CJ. *Canada Warbler (Wilsonia canadensis)*. Poole A, Gill F, editors. *Birds North Am Online* [Internet] 2010; Available from: <http://bna.birds.cornell.edu/bna/species/421>
  152. Berthold P, Gwinner E, Sonnenschein E. *Avian Migration* [Internet]. Springer Science & Business Media; 2013 [cited 2015 Nov 6]. Available from: <https://books.google.com/books?id=zDvvCAAQBAJ&pgis=1> ISBN:3662059576
  153. Ammon EM, Gilbert WM. *Wilson's Warbler (Wilsonia pusilla)*. Poole A, Gill F, editors. *Birds North Am Online* [Internet] 1999; Available from: [http://bna.birds.cornell.edu/BNA/account/Wilsons\\_Warbler/RECOMMENDED\\_CITATION.html](http://bna.birds.cornell.edu/BNA/account/Wilsons_Warbler/RECOMMENDED_CITATION.html)
  154. Green M, Mewaldt L, Duke R, Winkler D. *WILSON'S WARBLER* *Wilsonia pusilla*. In: Zeiner DC, Jr. WFL, Mayer KE, White M, editors. Calif Wildl Habitat Relationships Vol I-III. Sacramento, California: California Depart. of Fish and Game; 1990.
  155. Cox GW. *A Life History of the Mourning Warbler*. *Wilson Bull* [Internet] 1960 [cited 2015 Nov 17];72(1):5–28. Available from: <https://sora.unm.edu/node/127797>
  156. Pitocchelli J. *Mourning Warbler (Oporornis philadelphia)*. Poole A, Gill F, editors. *Birds North Am Online* [Internet] 1993; Available from: [http://bna.birds.cornell.edu/BNA/account/Mourning\\_Warbler/RECOMMENDED\\_CITATION.html](http://bna.birds.cornell.edu/BNA/account/Mourning_Warbler/RECOMMENDED_CITATION.html)
  157. Green M, Mewaldt L, Duke R, Winkler D. *COMMON YELLOWTHROAT* *Geothlypis trichas*. In: Zeiner DC, Jr. WFL, Mayer KE, White M, editors. Calif Wildl Habitat Relationships Vol I-III. Sacramento, California: California Depart. of Fish and Game; 1990.
  158. Guzy MJ, Ritchison G. *Common Yellowthroat (Geothlypis trichas)*. Poole A, Gill F, editors. *Birds North Am Online* [Internet] 1999; Available from: [http://bna.birds.cornell.edu/BNA/account/Common\\_Yellowthroat/RECOMMENDED\\_CITATION.html](http://bna.birds.cornell.edu/BNA/account/Common_Yellowthroat/RECOMMENDED_CITATION.html)

159. James RD. Habitat management guidelines for birds of Ontario wetlands, including marshes, swamps and fens or bogs of various types [Internet]. Ontario Minist Nat Resour. 1985. Available from: <http://wbn.scholarsportal.info/node/16950> ISBN:0-7794-2349-6
160. Kricher JC. Black-and-white Warbler (*Mniotilta varia*). Poole A, Gill F, editors. Birds North Am Online [Internet] 2014; Available from: [http://bna.birds.cornell.edu/BNA/account/Black-and-white\\_Warbler/RECOMMENDED\\_CITATION.html](http://bna.birds.cornell.edu/BNA/account/Black-and-white_Warbler/RECOMMENDED_CITATION.html)
161. Pitocchelli J, Jones J, Jones D, Bouchie J. Connecticut Warbler (*Oporornis agilis*). Poole A, Gill F, editors. Birds North Am Online [Internet] 2012; Available from: [http://bna.birds.cornell.edu/BNA/account/Connecticut\\_Warbler/RECOMMENDED\\_CITATION.html](http://bna.birds.cornell.edu/BNA/account/Connecticut_Warbler/RECOMMENDED_CITATION.html)
162. Gilbert WM, Sogge MK, Van Riper III C. Orange-crowned Warbler (*Vermivora celata*). Poole A, Gill F, editors. Birds North Am Online [Internet] 2010; Available from: [http://bna.birds.cornell.edu/BNA/account/Orange-crowned\\_Warbler/RECOMMENDED\\_CITATION.html](http://bna.birds.cornell.edu/BNA/account/Orange-crowned_Warbler/RECOMMENDED_CITATION.html)
163. Green M, Mewaldt L, Duke R, Winkler D. ORANGE-CROWNED WARBLER *Vermivora celata*. In: Zeiner DC, Jr. WFL, Mayer KE, White M, editors. Calif Wildl Habitat Relationships Vol I-III. Sacramento, California: California Depart. of Fish and Game; 1990.
164. Adlinger K, Bakermans M, Larkin J, Lehman J, Tisdale A. Monitoring and Evaluating Golden-winged Warbler Use of Breeding Habitat [Internet]. 2014. Available from: [http://www.nrcs.usda.gov/Internet/FSE\\_DOCUMENTS/nrcseprd331009.pdf](http://www.nrcs.usda.gov/Internet/FSE_DOCUMENTS/nrcseprd331009.pdf). Archived at: <http://www.webcitation.org/6lCy8jP7r>
165. Rimmer CC, Mcfarland. KP. Tennessee Warbler (*Vermivora peregrina*). Poole A, Gill F, editors. Birds North Am Online [Internet] 2012; Available from: [http://bna.birds.cornell.edu/BNA/account/Tennessee\\_Warbler/RECOMMENDED\\_CITATION.html](http://bna.birds.cornell.edu/BNA/account/Tennessee_Warbler/RECOMMENDED_CITATION.html)
166. Lowther PE, Williams JM. Nashville Warbler (*Vermivora ruficapilla*). Poole A, Gill F, editors. Birds North Am Online [Internet] 2011; Available from: [http://bna.birds.cornell.edu/BNA/account/Nashville\\_Warbler/RECOMMENDED\\_CITATION.html](http://bna.birds.cornell.edu/BNA/account/Nashville_Warbler/RECOMMENDED_CITATION.html)
167. Whitaker DM, Eaton SW. Northern Waterthrush (*Seiurus noveboracensis*). Poole A, Gill F, editors. Birds North Am Online [Internet] 2014; Available from: [http://bna.birds.cornell.edu/BNA/account/Northern\\_Waterthrush/RECOMMENDED\\_CITATION.html](http://bna.birds.cornell.edu/BNA/account/Northern_Waterthrush/RECOMMENDED_CITATION.html)
168. Porneluzi P, Van Horn MA, Donovan TM. Ovenbird (*Seiurus aurocapilla*). Poole A, Gill F, editors. Birds North Am Online [Internet] 2011;(88). Available from: <http://bna.birds.cornell.edu/BNA/species/088/articles/behavior>
169. Moldenhauer RR, Regelski DJ. Northern Parula (*Parula americana*). Poole A, Gill F, editors. Birds North Am Online [Internet] 2012; Available from: [http://bna.birds.cornell.edu/BNA/account/Northern\\_Parula/RECOMMENDED\\_CITATION.html](http://bna.birds.cornell.edu/BNA/account/Northern_Parula/RECOMMENDED_CITATION.html)
170. Venier L, Holmes S, Williams JM. Bay-breasted Warbler (*Dendroica castanea*). Poole A, Gill F, editors. Birds North Am Online [Internet] 2011; Available from: [http://bna.birds.cornell.edu/BNA/account/Bay-breasted\\_Warbler/RECOMMENDED\\_CITATION.html](http://bna.birds.cornell.edu/BNA/account/Bay-breasted_Warbler/RECOMMENDED_CITATION.html)
171. Slager DL, Rodewald PG. Disjunct Nocturnal Roosting by a Yellow-rumped Warbler ( *Setophaga coronata* ) during Migratory Stopover. Wilson J Ornithol [Internet] 2015 Mar;127(1):109–114. Available from: <http://www.bioone.org/doi/10.1676/14-038.1> DOI:10.1676/14-038.1
172. Hunt PD, Flaspohler DJ. Yellow-rumped Warbler (*Dendroica coronata*). Poole A, Gill F, editors. Birds North Am Online [Internet] 1998; Available from: <http://bna.birds.cornell.edu/bna/species/376>
173. Morse DH. Blackburnian Warbler (*Dendroica fusca*). Poole A, editor. Birds North Am Online [Internet] 2004; Available from: [http://bna.birds.cornell.edu/BNA/account/Blackburnian\\_Warbler/RECOMMENDED\\_CITATION.html](http://bna.birds.cornell.edu/BNA/account/Blackburnian_Warbler/RECOMMENDED_CITATION.html)
174. Dunn E, Hall GA. Magnolia Warbler (*Dendroica magnolia*). Poole A, Gill F, editors. Birds North Am Online [Internet] 1994; Available from: [http://bna.birds.cornell.edu/BNA/account/Magnolia\\_Warbler/RECOMMENDED\\_CITATION.html](http://bna.birds.cornell.edu/BNA/account/Magnolia_Warbler/RECOMMENDED_CITATION.html)
175. Wilson J, Herbert. W. Palm Warbler (*Dendroica palmarum*). Poole A, Gill F, editors. Birds North Am Online [Internet] 1996; Available from: [http://bna.birds.cornell.edu/BNA/account/Palm\\_Warbler/RECOMMENDED\\_CITATION.html](http://bna.birds.cornell.edu/BNA/account/Palm_Warbler/RECOMMENDED_CITATION.html)
176. Byers BE, Richardson M, Brauning DW. Chestnut-sided Warbler (*Dendroica pensylvanica*). Poole A, Gill F, editors. Birds North Am Online [Internet] 2013; Available from: [http://bna.birds.cornell.edu/BNA/account/Chestnut-sided\\_Warbler/RECOMMENDED\\_CITATION.html](http://bna.birds.cornell.edu/BNA/account/Chestnut-sided_Warbler/RECOMMENDED_CITATION.html)
177. Lowther PE, Celada C, Klein NK, Rimmer CC, Spector DA. Yellow Warbler (*Dendroica petechia*). Poole A, Gill F, editors. Birds North Am Online [Internet] 1999; Available from: [http://bna.birds.cornell.edu/BNA/account/Yellow\\_Warbler/RECOMMENDED\\_CITATION.html](http://bna.birds.cornell.edu/BNA/account/Yellow_Warbler/RECOMMENDED_CITATION.html)
178. Latta SC., Sondreal ML. Observations on the Abundance, Site Persistence, Home Range, Foraging, and Nesting of the Pine Warbler on Hispaniola, and First Record of Ground Nesting for This Species. Ornitol Neotrop [Internet] 1999 [cited 2015 Nov 18];10(1):43–54. Available from: <https://sora.unm.edu/node/119317>
179. Rodewald PG, Withgott JH, Smith KG. Pine Warbler (*Dendroica pinus*). Poole A, Gill F, editors. Birds North Am Online [Internet] 1999; Available from: [http://bna.birds.cornell.edu/BNA/account/Pine\\_Warbler/RECOMMENDED\\_CITATION.html](http://bna.birds.cornell.edu/BNA/account/Pine_Warbler/RECOMMENDED_CITATION.html)
180. Sherry TW, Holmes RT. American Redstart (*Setophaga ruticilla*). Poole A, Gill F, editors. Birds North Am Online [Internet] 1997;(277). Available from: <http://bna.birds.cornell.edu/BNA/species/277/articles/behavior>
181. Morse B. Weather and Migrating Fall Warblers in Eastern Washington. Washingt Ornithol Soc News [Internet] 2001 [cited 2015 Nov 17];(74). Available from: <http://www.wos.org/issue74.pdf>
182. DeLuca W, Holberton R, Hunt PD, Eliason BC. Blackpoll Warbler (*Dendroica striata*). Poole A, Gill F, editors. Birds North Am Online [Internet] 2013; Available from: [http://bna.birds.cornell.edu/BNA/account/Blackpoll\\_Warbler/RECOMMENDED\\_CITATION.html](http://bna.birds.cornell.edu/BNA/account/Blackpoll_Warbler/RECOMMENDED_CITATION.html)
183. Baltz ME, Latta SC. Cape May Warbler (*Dendroica tigrina*). Poole A, Gill F, editors. Birds North Am Online [Internet] 1998; Available from: [http://bna.birds.cornell.edu/BNA/account/Cape\\_May\\_Warbler/RECOMMENDED\\_CITATION.html](http://bna.birds.cornell.edu/BNA/account/Cape_May_Warbler/RECOMMENDED_CITATION.html)

184. Morse DH, Poole AF. Black-throated Green Warbler (*Dendroica virens*). Poole A, Gill F, editors. *Birds North Am Online* [Internet] 1993; Available from: [http://bna.birds.cornell.edu/BNA/account/Black-throated\\_Green\\_Warbler/RECOMMENDED\\_CITATION.html](http://bna.birds.cornell.edu/BNA/account/Black-throated_Green_Warbler/RECOMMENDED_CITATION.html)
185. Confer JL, Hartman P, Roth A. Golden-winged Warbler (*Vermivora chrysoptera*). Poole A, Stettenheim P, Gill F, editors. *Birds North Am Online* [Internet] 2011; Available from: [http://bna.birds.cornell.edu/BNA/account/Golden-winged\\_Warbler/RECOMMENDED\\_CITATION.html](http://bna.birds.cornell.edu/BNA/account/Golden-winged_Warbler/RECOMMENDED_CITATION.html)
186. Lowther PE, Cink CL. House Sparrow (*Passer domesticus*). Poole A, Stettenheim P, Gill F, editors. *Birds North Am Online* [Internet] 2006; Available from: [http://bna.birds.cornell.edu/BNA/account/House\\_Sparrow/RECOMMENDED\\_CITATION.html](http://bna.birds.cornell.edu/BNA/account/House_Sparrow/RECOMMENDED_CITATION.html)
187. Granholm S, Mewaldt L, Duke R. HOUSE SPARROW *Passer domesticus*. In: Zeiner DC, Jr. WFL, Mayer KE, White M, editors. *Calif Wildl Habitat Relationships Vol I-III*. Sacramento, California: California Depart. of Fish and Game; 1990.
188. Ahlborn G, Johnson N, Ahlborn G. RUFFED GROUSE *Bonasa umbellus*. In: Zeiner DC, Jr. WFL, Mayer KE, White M, editors. *Calif Wildl Habitat Relationships Vol I-III*. Sacramento, California: California Depart. of Fish and Game; 1990.
189. Rusch DH, Destefano S, Reynolds MC, Lauten D. Ruffed Grouse (*Bonasa umbellus*). Poole A, Gill F, editors. *Birds North Am Online* [Internet] 2000; Available from: [http://bna.birds.cornell.edu/BNA/account/Ruffed\\_Grouse/RECOMMENDED\\_CITATION.html](http://bna.birds.cornell.edu/BNA/account/Ruffed_Grouse/RECOMMENDED_CITATION.html)
190. McRoberts JT, Wallace MC, Eaton SW. Wild Turkey (*Meleagris gallopavo*). Poole A, Stettenheim P, Gill F, editors. *Birds North Am Online* [Internet] 2014; Available from: [http://bna.birds.cornell.edu/BNA/account/Wild\\_Turkey/RECOMMENDED\\_CITATION.html](http://bna.birds.cornell.edu/BNA/account/Wild_Turkey/RECOMMENDED_CITATION.html)
191. Novoa C, Dumas S, Resseguier J. Home-range size of Pyrenean grey partridges *Perdix perdix hispaniensis* during the breeding season. *Wildlife Biol*. 2006. p. 11–18.
192. Iowa Department of Natural Resources. Gray (Hungarian) partridge (*Perdix perdix*) [Internet]. 2001 [cited 2015 Nov 6]. Available from: <http://www.iowadnr.gov/Portals/idnr/uploads/education/Species/birds/Hun.pdf>. Archived at: <http://www.webcitation.org/6lCyR61f6>
193. Carroll JP. Gray Partridge (*Perdix perdix*). Poole A, Gill F, editors. *Birds North Am Online* [Internet] 1993; Available from: [http://bna.birds.cornell.edu/BNA/account/Gray\\_Partridge/RECOMMENDED\\_CITATION.html](http://bna.birds.cornell.edu/BNA/account/Gray_Partridge/RECOMMENDED_CITATION.html)
194. New World Encyclopedia contributors. Pheasant [Internet]. *New World Encycl*. 2009 [cited 2015 Nov 26]. Available from: <http://www.newworldencyclopedia.org/entry/Pheasant> Archived at: <http://www.webcitation.org/6lD38ZdUX>
195. Ahlborn G, Johnson N, Ahlborn G. RING-NECKED PHEASANT *Phasianus colchicus*. In: Zeiner DC, Jr. WFL, Mayer KE, White M, editors. *Calif Wildl Habitat Relationships Vol I-III*. Sacramento, California: California Depart. of Fish and Game; 1990.
196. Giudice JH, Ratti JT. Ring-necked Pheasant (*Phasianus colchicus*). Poole A, Gill F, editors. *Birds North Am Online* [Internet] 2001; Available from: [http://bna.birds.cornell.edu/BNA/account/Ring-necked\\_Pheasant/RECOMMENDED\\_CITATION.html](http://bna.birds.cornell.edu/BNA/account/Ring-necked_Pheasant/RECOMMENDED_CITATION.html)
197. Connelly JW, Gratson MW, Reese KP. Sharp-tailed Grouse (*Tympanuchus phasianellus*). Poole A, Gill F, editors. *Birds North Am Online* [Internet] 1998; Available from: [http://bna.birds.cornell.edu/BNA/account/Sharp-tailed\\_Grouse/RECOMMENDED\\_CITATION.html](http://bna.birds.cornell.edu/BNA/account/Sharp-tailed_Grouse/RECOMMENDED_CITATION.html)
198. Wiebe KL, Moore WS. Northern Flicker (*Colaptes auratus*). Poole A, Gill F, editors. *Birds North Am Online* [Internet] 2008; Available from: [http://bna.birds.cornell.edu/BNA/account/Northern\\_Flicker/RECOMMENDED\\_CITATION.html](http://bna.birds.cornell.edu/BNA/account/Northern_Flicker/RECOMMENDED_CITATION.html)
199. Tobalske BW. Scaling of Muscle Composition, Wing Morphology, and Intermittent Flight Behavior in Woodpeckers. *Auk* [Internet] 1996 Jan [cited 2015 Nov 5];113(1):151–177. Available from: <http://www.jstor.org/stable/info/10.2307/4088943> DOI:10.2307/4088943
200. Bull EL, Jackson JA. Pileated Woodpecker (*Dryocopus pileatus*). Poole A, Gill F, editors. *Birds North Am Online* [Internet] 1995; Available from: [http://bna.birds.cornell.edu/BNA/account/Pileated\\_Woodpecker/RECOMMENDED\\_CITATION.html](http://bna.birds.cornell.edu/BNA/account/Pileated_Woodpecker/RECOMMENDED_CITATION.html)
201. Vierling KT, Saab VA, Tobalske BW. Lewis's Woodpecker (*Melanerpes lewis*). Poole A, Gill F, editors. *Birds North Am Online* [Internet] 2013; Available from: [http://bna.birds.cornell.edu/BNA/account/Lewis\\_Woodpecker/RECOMMENDED\\_CITATION.html](http://bna.birds.cornell.edu/BNA/account/Lewis_Woodpecker/RECOMMENDED_CITATION.html)
202. Frei B, Smith KG, Withgott JH, Rodewald PG. Red-headed Woodpecker (*Melanerpes erythrocephalus*). Poole A, Gill F, editors. *Birds North Am Online* [Internet] 2015; Available from: [http://bna.birds.cornell.edu/BNA/account/Red-headed\\_Woodpecker/RECOMMENDED\\_CITATION.html](http://bna.birds.cornell.edu/BNA/account/Red-headed_Woodpecker/RECOMMENDED_CITATION.html)
203. Leonard, Jr. DL. American Three-toed Woodpecker (*Picoides dorsalis*). Poole A, Gill F, editors. *Birds North Am Online* [Internet] 2001; Available from: [http://bna.birds.cornell.edu/BNA/account/American\\_Three-toed\\_Woodpecker/RECOMMENDED\\_CITATION.html](http://bna.birds.cornell.edu/BNA/account/American_Three-toed_Woodpecker/RECOMMENDED_CITATION.html)
204. Jackson JA, Ouellet HR. Downy Woodpecker (*Picoides pubescens*). Poole A, Gill F, editors. *Birds North Am Online* [Internet] 2002; Available from: [http://bna.birds.cornell.edu/BNA/account/Downy\\_Woodpecker/RECOMMENDED\\_CITATION.html](http://bna.birds.cornell.edu/BNA/account/Downy_Woodpecker/RECOMMENDED_CITATION.html)
205. Kilham L. Courtship and Territorial Behaviour of Hairy Woopeckers. *Auk* [Internet] 1960;77(3):259–270. Available from: <http://www.jstor.org/stable/pdf/4082482>
206. Covert-Bratland KA, Block WM, Theimer TC. Hairy woodpecker winter ecology in ponderosa pine forests representing different ages since wildfire. *J Wildl Manage* [Internet] 2006 [cited 2015 Nov 6];70(5):1379–1392. Available from: <http://www.treesearch.fs.fed.us/pubs/26328>
207. Jackson JA, Ouellet HR, Jackson BJ. Hairy Woodpecker (*Picoides villosus*). Poole A, Gill F, editors. *Birds North Am Online* [Internet] 2002; Available from: [http://bna.birds.cornell.edu/BNA/account/Hairy\\_Woodpecker/RECOMMENDED\\_CITATION.html](http://bna.birds.cornell.edu/BNA/account/Hairy_Woodpecker/RECOMMENDED_CITATION.html)
208. Kilham L. Reproductive Behavior of Hairy Woodpeckers I. Pair Formation and Courtship. *Wilson Bull* [Internet] 1966;78(3):251–265. Available from: <http://www.jstor.org/stable/4159500>
209. Swanson DL, Ingold JL, Wallace GE. Ruby-crowned Kinglet (*Regulus calendula*). Poole A, Gill F, editors. *Birds North Am Online* [Internet] 1994;



- Available from: [http://bna.birds.cornell.edu/BNA/account/Ruby-crowned\\_Kinglet/RECOMMENDED\\_CITATION.html](http://bna.birds.cornell.edu/BNA/account/Ruby-crowned_Kinglet/RECOMMENDED_CITATION.html)
210. Swanson DL, Ingold JL, Galati R. Golden-crowned Kinglet (*Regulus satrapa*). Poole A, Gill F, editors. *Birds North Am Online* [Internet] 2012; Available from: [http://bna.birds.cornell.edu/BNA/account/Golden-crowned\\_Kinglet/RECOMMENDED\\_CITATION.html](http://bna.birds.cornell.edu/BNA/account/Golden-crowned_Kinglet/RECOMMENDED_CITATION.html)
211. Ghalambor CK, Martin TE. Red-breasted Nuthatch (*Sitta canadensis*). Poole A, Gill F, editors. *Birds North Am Online* [Internet] 1999; Available from: [http://bna.birds.cornell.edu/BNA/account/Red-breasted\\_Nuthatch/RECOMMENDED\\_CITATION.html](http://bna.birds.cornell.edu/BNA/account/Red-breasted_Nuthatch/RECOMMENDED_CITATION.html)
212. Ball SC. Migration of Red-Breasted Nuthatches in Gaspé. *Ecol Monogr* [Internet] 1947 Feb;17(4):501–533. Available from: <http://doi.wiley.com/10.2307/1948598> DOI:10.2307/1948598
213. Grubb, Jr. TC, Pravosudov V V. White-breasted Nuthatch (*Sitta carolinensis*). Poole A, Gill F, editors. *Birds North Am Online* [Internet] 2008; Available from: [http://bna.birds.cornell.edu/BNA/account/White-breasted\\_Nuthatch/RECOMMENDED\\_CITATION.html](http://bna.birds.cornell.edu/BNA/account/White-breasted_Nuthatch/RECOMMENDED_CITATION.html)
214. Simply Wild Canada. Owls of Canada [Internet]. [cited 2015 Nov 5]. Available from: <http://www.simplywildcanada.com/wild-species/birds-of-canada/owls-of-canada/> Archived at: <http://www.webcitation.org/6lD3RVJm6>
215. Wiggins DA, Holt DW, Leasure SM. Short-eared Owl (*Asio flammeus*). Poole A, Gill F, editors. *Birds North Am Online* [Internet] 2006; Available from: [http://bna.birds.cornell.edu/BNA/account/Short-eared\\_Owl/RECOMMENDED\\_CITATION.html](http://bna.birds.cornell.edu/BNA/account/Short-eared_Owl/RECOMMENDED_CITATION.html)
216. Bennett JR, Bloom PH. Range and Habitat Use by Great Horned Owls (*Bubo virginianus*) in Southern California. *J Raptor Res* [Internet] 2005;39(2):119–126. Available from: <https://pubs.er.usgs.gov/publication/70029641>
217. Artuso C, Houston CS, Smith DG, Rohner C. Great Horned Owl (*Bubo virginianus*). Poole A, Gill F, editors. *Birds North Am Online* [Internet] 2014; Available from: [http://bna.birds.cornell.edu/BNA/account/Great\\_Horned\\_Owl/RECOMMENDED\\_CITATION.html](http://bna.birds.cornell.edu/BNA/account/Great_Horned_Owl/RECOMMENDED_CITATION.html)
218. Makarieva AM, Gorshkov VG, Li BL. Why do population density and inverse home range scale differently with body size?: Implications for ecosystem stability. *Ecol Complex* 2005;2(3):259–271.
219. Mazur KM, James PC. Barred Owl (*Strix varia*). Poole A, Gill F, editors. *Birds North Am Online* [Internet] 2000; Available from: [http://bna.birds.cornell.edu/BNA/account/Barred\\_Owl/RECOMMENDED\\_CITATION.html](http://bna.birds.cornell.edu/BNA/account/Barred_Owl/RECOMMENDED_CITATION.html)
220. Kroeger RA, Grushka HD, Helvey TC. Low Speed Aerodynamics for Ultra-Quiet Flight [Internet]. 1972 Mar. Available from: <http://oai.dtic.mil/oai/oai?verb=getRecord&metadataPrefix=html&identifier=AD0893426> Archived at: <http://www.webcitation.org/6lD3lBJMn>
221. Cabe PR. European Starling (*Sturnus vulgaris*). Poole A, Gill F, editors. *Birds North Am Online* [Internet] 1993; Available from: [http://bna.birds.cornell.edu/BNA/account/European\\_Starling/RECOMMENDED\\_CITATION.html](http://bna.birds.cornell.edu/BNA/account/European_Starling/RECOMMENDED_CITATION.html)
222. Granholm S, Mewaldt L, Duke R. EUROPEAN STARLING *Sturnus vulgaris*. In: Zeiner DC, Jr. WFL, Mayer KE, White M, editors. *Calif Wildl Habitat Relationships Vol I-III*. Sacramento, California: California Depart. of Fish and Game; 1990.
223. Weidensaul S, Robinson TR, Sargent RR, Sargent MB. Ruby-throated Hummingbird (*Archilochus colubris*). Poole A, Gill F, editors. *Birds North Am Online* [Internet] 2013; Available from: [http://bna.birds.cornell.edu/BNA/account/Ruby-throated\\_Hummingbird/RECOMMENDED\\_CITATION.html](http://bna.birds.cornell.edu/BNA/account/Ruby-throated_Hummingbird/RECOMMENDED_CITATION.html)
224. Chambers L. Ruby-throated Hummingbird [Internet]. [cited 2015 Nov 13]. Available from: <http://www.hummingbirds.net/rubythroated.html>. Archived at: <http://www.webcitation.org/6lD3wmHf8>
225. Rousseu F, Charette Y, Bélisle M. Resource defense and monopolization in a marked population of ruby-throated hummingbirds (*Archilochus colubris*). *Ecol Evol* John Wiley and Sons Ltd; 2014;4(6):776–793.
226. Texas Parks and Wildlife Department. Urban Wildlife Fact Sheet Set [Internet]. [cited 2015 Nov 13]. Available from: [https://tpwd.texas.gov/publications/pwdpubs/media/pwd\\_if\\_k0700\\_0167.pdf](https://tpwd.texas.gov/publications/pwdpubs/media/pwd_if_k0700_0167.pdf) Archived at: <http://www.webcitation.org/6lCxcCrDf>
227. Kroodsmma DE, Verner J. Marsh Wren (*Cistothorus palustris*). Poole A, Gill F, editors. *Birds North Am Online* [Internet] 2014; Available from: [http://bna.birds.cornell.edu/BNA/account/Marsh\\_Wren/RECOMMENDED\\_CITATION.html](http://bna.birds.cornell.edu/BNA/account/Marsh_Wren/RECOMMENDED_CITATION.html)
228. Gutzwiller KJ, Anderson SH. Habitat Suitability Index Models: Marsh Wren. *Biol Rep* [Internet] 1987;82(10.139):13. Available from: <http://www.nwrc.usgs.gov/wdb/pub/hsi/hsi-139.pdf>
229. Hartman CA, Ackerman JT, Herring G, Isanhart J, Herzog M. Marsh wrens as bioindicators of mercury in wetlands of Great Salt Lake: do blood and feathers reflect site-specific exposure risk to bird reproduction? *Environ Sci Technol* [Internet] American Chemical Society; 2013 Jun 18 [cited 2015 Nov 18];47(12):6597–605. Available from: <http://dx.doi.org/10.1021/es400910x> PMID: 23692510
230. Burns JT. Nests, Territories, and Reproduction of Sedge Wrens (*Cistothorus platensis*). *Wilson Bull* [Internet] 1982 [cited 2015 Nov 18];94(3):338–349. Available from: <http://www.jstor.org/stable/4161644>
231. Herkert JR, Kroodsmma DE, Gibbs JP. Sedge Wren (*Cistothorus platensis*). Poole A, Gill F, editors. *Birds North Am Online* [Internet] 2001; Available from: [http://bna.birds.cornell.edu/BNA/account/Sedge\\_Wren/RECOMMENDED\\_CITATION.html](http://bna.birds.cornell.edu/BNA/account/Sedge_Wren/RECOMMENDED_CITATION.html)
232. Fujikawa A. Home range of *Coryphaspiza melanotis* and *Cistothorus platensis* in the central Brasil and a review of home ranges and territories of birds in the Neotropics [Internet]. Universidade de São Paulo; 2012 [cited 2015 Nov 18]. Available from: <http://www.teses.usp.br/teses/disponiveis/41/41134/tde-17012012-133318/>
233. Kroodsmma DE. Coexistence of Bewick's Wrens and House Wrens in Oregon. *Auk* [Internet] 1973 [cited 2015 Dec 1];90(2):341–352. Available from: <http://www.jstor.org/stable/4084301>

234. Johnson LS. House Wren (*Troglodytes aedon*). Poole A, Gill F, editors. *Birds North Am Online* [Internet] 2014; Available from: <http://bna.birds.cornell.edu/bna/species/380>
235. Hejl SJ, Holmes JA, Kroodsma DE. Winter Wren (*Troglodytes troglodytes*). Poole A, Gill F, editors. *Birds North Am Online* [Internet] 2002; Available from: [http://bna.birds.cornell.edu/BNA/account/Winter\\_Wren/RECOMMENDED\\_CITATION.html](http://bna.birds.cornell.edu/BNA/account/Winter_Wren/RECOMMENDED_CITATION.html)
236. Bevier LR, Poole AF, Moskoff W. Veery (*Catharus fuscescens*). Poole A, editor. *Birds North Am Online* [Internet] 2005; Available from: [http://bna.birds.cornell.edu/BNA/account/Veery/RECOMMENDED\\_CITATION.html](http://bna.birds.cornell.edu/BNA/account/Veery/RECOMMENDED_CITATION.html)
237. Bayly NJ, Gómez C, Hobson KA. Energy reserves stored by migrating Gray-cheeked Thrushes *Catharus minimus* at a spring stopover site in northern Colombia are sufficient for a long-distance flight to North America. Ishtiaq F, editor. *Ibis (Lond 1859)* [Internet] 2013 Apr 16 [cited 2015 Nov 18];155(2):271–283. Available from: <http://doi.wiley.com/10.1111/ibi.12029>
238. Dellinger R, Wood PB, Jones PW, Donovan TM. Hermit Thrush (*Catharus guttatus*). Poole A, Gill F, editors. *Birds North Am Online* [Internet] 2012; Available from: [http://bna.birds.cornell.edu/BNA/account/Hermit\\_Thrush/RECOMMENDED\\_CITATION.html](http://bna.birds.cornell.edu/BNA/account/Hermit_Thrush/RECOMMENDED_CITATION.html)
239. Rinaldi T, Worland M. Conservation Assessment for Swainson’s Thrush (*Catharus ustulatus*) [Internet]. USDA For Serv East Reg. 2004 [cited 2015 Nov 18]. Available from: [http://www.fs.usda.gov/Internet/FSE\\_DOCUMENTS/fsm91\\_054321.pdf](http://www.fs.usda.gov/Internet/FSE_DOCUMENTS/fsm91_054321.pdf). Archived at: <http://www.webcitation.org/6lCyjP0XW>
240. Mack DE, Yong W. Swainson’s Thrush (*Catharus ustulatus*). Poole A, Gill F, editors. *Birds North Am Online* [Internet] 2000; Available from: [http://bna.birds.cornell.edu/BNA/account/Swainsons\\_Thrush/RECOMMENDED\\_CITATION.html](http://bna.birds.cornell.edu/BNA/account/Swainsons_Thrush/RECOMMENDED_CITATION.html)
241. Power HW, Lombard MP. Mountain Bluebird (*Sialia currucoides*). Poole A, Gill F, editors. *Birds North Am Online* [Internet] 1996; Available from: [http://bna.birds.cornell.edu/BNA/account/Mountain\\_Bluebird/RECOMMENDED\\_CITATION.html](http://bna.birds.cornell.edu/BNA/account/Mountain_Bluebird/RECOMMENDED_CITATION.html)
242. Gaines D, Mewaldt L, Duke R. MOUNTAIN BLUEBIRD *Sialia currucoides*. In: Zeiner DC, Jr. WFL, Mayer KE, White M, editors. *Calif Wildl Habitat Relationships Vol I-III*. Sacramento, California: California Depart. of Fish and Game; 1990.
243. Gowaty PA, Plissner JH. Eastern Bluebird (*Sialia sialis*). Poole A, Gill F, editors. *Birds North Am Online* [Internet] 2015;(381). Available from: <http://bna.birds.cornell.edu/bna/species/381/articles/demography>
244. Hirth DH, Hester AE, Greeley F. Dispersal and Flocking of Marked Young Robins (*Turdus M. Migratorius*) after Fledging. *Bird-Banding* [Internet] 1969 [cited 2015 Dec 1];40(3):208. Available from: <http://www.jstor.org/stable/10.2307/4511580?origin=crossref>
245. Vanderhoff N, Sallabanks R, James FC. American Robin (*Turdus migratorius*). Poole A, Gill F, editors. *Birds North Am Online* [Internet] 2014; Available from: [http://bna.birds.cornell.edu/BNA/account/American\\_Robin/RECOMMENDED\\_CITATION.html](http://bna.birds.cornell.edu/BNA/account/American_Robin/RECOMMENDED_CITATION.html)
246. Diuk-Wasser MA, Molaei G, Simpson JE, Folsom-O’Keefe CM, Armstrong PM, Andreadis TG. Avian communal roosts as amplification foci for West Nile virus in urban areas in Northeastern United States. *Am J Trop Med Hyg* 2010;82(2):337–343.
247. Granholm S, Mewaldt L, Duke R. AMERICAN ROBIN *Turdus migratorius*. In: Zeiner DC, Jr. WFL, Mayer KE, White M, editors. *Calif Wildl Habitat Relationships Vol I-III*. Sacramento, California: California Depart. of Fish and Game; 1990.
248. Muijres FT, Bowlin MS, Johansson LC, Hedenström A. Vortex wake, downwash distribution, aerodynamic performance and wingbeat kinematics in slow-flying pied flycatchers. *J R Soc Interface* [Internet] 2012 Feb 7 [cited 2015 Nov 6];9(67):292–303. Available from: <https://www.ncbi.nlm.nih.gov/pmc/articles/PMC3243385/> PMID: 21676971
249. Altman B, Sallabanks R. Olive-sided Flycatcher (*Contopus cooperi*). Poole A, Gill F, editors. *Birds North Am Online* [Internet] 2012; Available from: [http://bna.birds.cornell.edu/BNA/account/Olive-sided\\_Flycatcher/RECOMMENDED\\_CITATION.html](http://bna.birds.cornell.edu/BNA/account/Olive-sided_Flycatcher/RECOMMENDED_CITATION.html)
250. Otto P. What’s a stranded wood-pewee to do? [Internet]. *Kane Cty Chron*. 2012 [cited 2015 Nov 18]. Available from: [http://www.kcchronicle.com/mobile/article.xml/articles/2012/11/02/r\\_6zeodgkeslmsrmtheo2qvg/index.xml](http://www.kcchronicle.com/mobile/article.xml/articles/2012/11/02/r_6zeodgkeslmsrmtheo2qvg/index.xml) Archived at: <http://www.webcitation.org/6lD4PICRO>
251. Bemis C, Rising JD. Western Wood-Pewee (*Contopus sordidulus*). Poole A, Gill F, editors. *Birds North Am Online* [Internet] 1999; Available from: [http://bna.birds.cornell.edu/BNA/account/Western\\_Wood-Pewee/RECOMMENDED\\_CITATION.html](http://bna.birds.cornell.edu/BNA/account/Western_Wood-Pewee/RECOMMENDED_CITATION.html)
252. Eckhardt RC. The Adaptive Syndromes of Two Guilds of Insectivorous Birds in the Colorado Rocky Mountains. *Ecol Monogr* [Internet] 1979 [cited 2015 Nov 18];49(2):129–149. Available from: <http://www.jstor.org/stable/1942510>
253. McCarty JP. Eastern Wood-Pewee (*Contopus virens*). Poole A, Gill F, editors. *Birds North Am Online* [Internet] 1996; Available from: [http://bna.birds.cornell.edu/BNA/account/Eastern\\_Wood-Pewee/RECOMMENDED\\_CITATION.html](http://bna.birds.cornell.edu/BNA/account/Eastern_Wood-Pewee/RECOMMENDED_CITATION.html)
254. Lowther PE. Alder Flycatcher (*Empidonax alnorum*). Poole A, Gill F, editors. *Birds North Am Online* [Internet] 1999; Available from: [http://bna.birds.cornell.edu/BNA/account/Alder\\_Flycatcher/RECOMMENDED\\_CITATION.html](http://bna.birds.cornell.edu/BNA/account/Alder_Flycatcher/RECOMMENDED_CITATION.html)
255. Dunson B. The Incredible Flight of a Willow Flycatcher [Internet]. *Galax Gaz*. 2014 [cited 2015 Nov 18]. Available from: <http://www.galaxgazette.com/content/incredible-flight-willow-flycatcher> Archived at: <http://www.webcitation.org/6lD4ZehQb>
256. Gross DA, Lowther PE. Yellow-bellied Flycatcher (*Empidonax flaviventris*). Poole A, Gill F, editors. *Birds North Am Online* [Internet] 2011; Available from: [http://bna.birds.cornell.edu/BNA/account/Yellow-bellied\\_Flycatcher/RECOMMENDED\\_CITATION.html](http://bna.birds.cornell.edu/BNA/account/Yellow-bellied_Flycatcher/RECOMMENDED_CITATION.html)
257. Doyon F, Higgelke PE, MacLeod HL. Least Flycatcher (*Empidonax minimus*) [Internet]. *Prep Millar West For Prod Biodivers Assess Proj - ISFORT*. 2000 [cited 2015 Nov 18]. Available from: [http://isfort.uqo.ca/sites/isfort.uqo.ca/files/fichiers/publications\\_ISFORT/least\\_flycatcher\\_hsm.pdf](http://isfort.uqo.ca/sites/isfort.uqo.ca/files/fichiers/publications_ISFORT/least_flycatcher_hsm.pdf). Archived

- at: <http://www.webcitation.org/6lD4d2d7K>
258. Tarof S, Briskie J V. Least Flycatcher (*Empidonax minimus*). Poole A, Gill F, editors. *Birds North Am Online* [Internet] 2008; Available from: [http://bna.birds.cornell.edu/BNA/account/Least\\_Flycatcher/RECOMMENDED\\_CITATION.html](http://bna.birds.cornell.edu/BNA/account/Least_Flycatcher/RECOMMENDED_CITATION.html)
  259. Cardinal SN, Paxton EH. Home Range, movement, and habitat use of the Southwestern Willow Flycatcher, Roosevelt Lake, AZ - 2004 [Internet]. US Geol Surv Rep to US Bur Reclamation, Phoenix. 2005 [cited 2015 Nov 18]. p. 26. Available from: <http://sbsc.wr.usgs.gov/cprs/research/projects/swwf/Reports/telemetry2004report.pdf>
  260. Sedgwick JA. Willow Flycatcher (*Empidonax traillii*). Poole A, Gill F, editors. *Birds North Am Online* [Internet] 2000; Available from: [http://bna.birds.cornell.edu/BNA/account/Willow\\_Flycatcher/RECOMMENDED\\_CITATION.html](http://bna.birds.cornell.edu/BNA/account/Willow_Flycatcher/RECOMMENDED_CITATION.html)
  261. Miller KE, Lanyon WE. Great Crested Flycatcher (*Myiarchus crinitus*). Poole A, Gill F, editors. *Birds North Am Online* [Internet] 1997; Available from: [http://bna.birds.cornell.edu/BNA/account/Great\\_Crested\\_Flycatcher/RECOMMENDED\\_CITATION.html](http://bna.birds.cornell.edu/BNA/account/Great_Crested_Flycatcher/RECOMMENDED_CITATION.html)
  262. Weeks Jr. HP. Eastern Phoebe (*Sayornis phoebe*). Poole A, Gill F, editors. *Birds North Am Online* [Internet] 2011; Available from: [http://bna.birds.cornell.edu/BNA/account/Eastern\\_Phoebe/RECOMMENDED\\_CITATION.html](http://bna.birds.cornell.edu/BNA/account/Eastern_Phoebe/RECOMMENDED_CITATION.html)
  263. Johnston DW. Niche Relationships among Some Deciduous Forest Flycatchers. *Auk* [Internet] 1971;88(4):796–804. Available from: <http://www.jstor.org/stable/4083838>
  264. Gaines D, Mewaldt L, Duke R. SAY’S PHOEBE *Sayornis saya*. In: Zeiner DC, Jr. WFL, Mayer KE, White M, editors. *Calif Wildl Habitat Relationships Vol I-III*. Sacramento, California: California Depart. of Fish and Game; 1990.
  265. Schukman JM, Wolf BO. Say’s Phoebe (*Sayornis saya*). Poole A, Gill F, editors. *Birds North Am Online* [Internet] 1998; Available from: <http://bna.birds.cornell.edu/bna/species/374>
  266. Murphy MT. Eastern Kingbird (*Tyrannus tyrannus*). Poole A, Gill F, editors. *Birds North Am Online* [Internet] 1996; Available from: [http://bna.birds.cornell.edu/BNA/account/Eastern\\_Kingbird/RECOMMENDED\\_CITATION.html](http://bna.birds.cornell.edu/BNA/account/Eastern_Kingbird/RECOMMENDED_CITATION.html)
  267. Gamble LR, Bergin TM. Western Kingbird (*Tyrannus verticalis*). Poole A, Gill F, editors. *Birds North Am Online* [Internet] 2012; Available from: [http://bna.birds.cornell.edu/BNA/account/Western\\_Kingbird/RECOMMENDED\\_CITATION.html](http://bna.birds.cornell.edu/BNA/account/Western_Kingbird/RECOMMENDED_CITATION.html)
  268. Hesperheide HA. Competition and the Genus *Tyrannus*. *Wilson Bull* [Internet] 1964 [cited 2015 Dec 1];76(3):265–281. Available from: <https://sora.unm.edu/node/128154>
  269. Rodewald PG, James. RD. Yellow-throated Vireo (*Vireo flavifrons*). Poole A, Gill F, editors. *Birds North Am Online* [Internet] 2011; Available from: [http://bna.birds.cornell.edu/BNA/account/Yellow-throated\\_Vireo/RECOMMENDED\\_CITATION.html](http://bna.birds.cornell.edu/BNA/account/Yellow-throated_Vireo/RECOMMENDED_CITATION.html)
  270. James RD. Foraging Behavior and Habitat Selection of Three Species of Vireos in Southern Ontario. *Wilson Bull* [Internet] 1976 [cited 2015 Dec 1];88(1):62–75. Available from: <https://sora.unm.edu/node/129254>
  271. Sterling R. Vireo *gilvus*: eastern warbling-vireo [Internet]. *Anim Divers Web*. 2011 [cited 2015 Dec 1]. Available from: [http://www.biokids.umich.edu/critters/Vireo\\_gilvus/](http://www.biokids.umich.edu/critters/Vireo_gilvus/) Archived at: <http://www.webcitation.org/6lD4knNii>
  272. Gardali T, Ballard G. Warbling Vireo (*Vireo gilvus*). Poole A, Gill F, editors. *Birds North Am Online* [Internet] 2000; Available from: [http://bna.birds.cornell.edu/BNA/account/Warbling\\_Vireo/RECOMMENDED\\_CITATION.html](http://bna.birds.cornell.edu/BNA/account/Warbling_Vireo/RECOMMENDED_CITATION.html)
  273. Cimprich DA, Moore FR, Guilfoyle MP. Red-eyed Vireo (*Vireo olivaceus*). Poole A, Gill F, editors. *Birds North Am Online* [Internet] 2000; Available from: [http://bna.birds.cornell.edu/BNA/account/Red-eyed\\_Vireo/RECOMMENDED\\_CITATION.html](http://bna.birds.cornell.edu/BNA/account/Red-eyed_Vireo/RECOMMENDED_CITATION.html)
  274. Moskoff W, Robinson SK. Philadelphia Vireo (*Vireo philadelphicus*). Poole A, Gill F, editors. *Birds North Am Online* [Internet] 2011; Available from: [http://bna.birds.cornell.edu/BNA/account/Philadelphia\\_Vireo/RECOMMENDED\\_CITATION.html](http://bna.birds.cornell.edu/BNA/account/Philadelphia_Vireo/RECOMMENDED_CITATION.html)
  275. Morton E, James RD. Blue-headed Vireo (*Vireo solitarius*). Poole A, Gill F, editors. *Birds North Am Online* [Internet] 2014; Available from: <http://bna.birds.cornell.edu/bna/species/379>
